# Supplementary material
Source: publisher site journal article supplement (https://www.dovepress.com/get_supplementary_file.php?f=168351.xlsx)
Supplement: Supplementary file 1 [file get_supplementary_file.php]

## Sheet: Table S1
Table S1. The univariate survival analysis results of miRNAs.
ID	HR	z	pvalue
hsa-mir-4435-1	3.47453	4.09971	4.1367e-05
hsa-mir-4741	2.49702	3.7181	0.000200727
hsa-mir-4747	5.14721	3.60198	0.000315802
hsa-mir-4761	19.4551	3.44455	0.000572012
hsa-mir-4670	2.34972	3.3913	0.000695611
hsa-mir-5007	97.5786	3.30086	0.000963889
hsa-mir-4419b	97.5786	3.30086	0.000963889
hsa-mir-595	29.5312	3.24168	0.00118829
hsa-mir-4650-2	29.5312	3.24168	0.00118829
hsa-mir-6865	6.04672	3.23275	0.00122606
hsa-mir-548x	16.1028	3.08089	0.0020638
hsa-mir-3202-1	2.76182	2.95942	0.00308216
hsa-mir-421	1.9611	2.94721	0.00320658
hsa-mir-887	0.516994	-2.9323	0.00336461
hsa-mir-1293	1.28195	2.8734	0.00406075
hsa-mir-4704	2.9377	2.83874	0.00452917
hsa-mir-548ak	26.8836	2.76701	0.00565737
hsa-mir-3686	5.74456	2.63133	0.00850509
hsa-mir-4709	0.722254	-2.56372	0.0103556
hsa-mir-6824	1.97026	2.56216	0.0104022
hsa-mir-1538	0.617894	-2.55599	0.0105885
hsa-mir-5700	3.75294	2.54306	0.0109886
hsa-mir-1910	1.52688	2.52911	0.0114354
hsa-mir-151a	2.12203	2.52163	0.0116814
hsa-mir-548az	1.62222	2.49509	0.0125926
hsa-mir-6741	1.97492	2.48602	0.0129182
hsa-mir-133a-1	0.757567	-2.47137	0.0134597
hsa-mir-3158-1	1.58962	2.40787	0.016046
hsa-mir-3606	2.26484	2.40229	0.0162926
hsa-mir-500a	0.596664	-2.38947	0.0168728
hsa-mir-501	0.563665	-2.37376	0.017608
hsa-mir-5692c-1	4.80186	2.37064	0.0177571
hsa-mir-3162	4.62016	2.36	0.0182747
hsa-mir-3144	1.48464	2.35609	0.0184684
hsa-mir-4759	7.53986	2.33371	0.0196108
hsa-mir-3149	1.7199	2.32473	0.0200865
hsa-mir-4769	0.288001	-2.32303	0.0201777
hsa-mir-596	9.9153	2.29443	0.0217655
hsa-mir-4521	1.43668	2.28834	0.0221175
hsa-mir-24-1	1.77574	2.285	0.0223128
hsa-mir-6783	1.60411	2.27975	0.0226225
hsa-mir-24-2	1.75266	2.25065	0.0244075
hsa-let-7a-3	1.61859	2.24579	0.0247177
hsa-mir-4424	0.658579	-2.23618	0.02534
hsa-let-7a-1	1.61279	2.23444	0.0254539
hsa-mir-622	2.35198	2.21876	0.0265029
hsa-let-7f-1	1.36045	2.21847	0.0265225
hsa-let-7f-2	1.35783	2.21187	0.0269756
hsa-mir-6850	2.10583	2.16548	0.0303506
hsa-mir-548n	1.54769	2.16487	0.0303979
hsa-mir-4782	1.98646	2.14609	0.0318658
hsa-mir-5089	4.10489	2.13997	0.0323573
hsa-mir-6822	0.448961	-2.13817	0.0325033
hsa-mir-4701	1.75136	2.11439	0.0344823
hsa-mir-3157	0.732255	-2.1034	0.0354309
hsa-mir-3654	1.66156	2.09988	0.0357394
hsa-mir-6830	5.78666	2.09229	0.0364125
hsa-mir-3910-1	2.00403	2.08705	0.0368833
hsa-mir-188	0.705512	-2.07646	0.037851
hsa-mir-3159	3.09799	2.06738	0.0386979
hsa-mir-4426	2.63756	2.06061	0.0393401
hsa-mir-4739	0.391557	-2.06004	0.0393944
hsa-mir-6818	1.5647	2.05777	0.0396124
hsa-mir-150	0.839364	-2.04298	0.0410549
hsa-mir-885	0.777858	-2.03348	0.0420043
hsa-mir-6503	0.762858	-2.03332	0.0420198
hsa-mir-4444-2	1.33858	2.03156	0.0421984
hsa-mir-1231	4.5948	2.03	0.0423564
hsa-mir-126	0.632941	-2.01931	0.0434548
hsa-mir-519c	3.34996	2.01373	0.0440377
hsa-mir-6505	0.349113	-2.01307	0.0441077
hsa-mir-6499	1.79639	2.01056	0.0443715
hsa-mir-4448	3.66214	2.00983	0.044449
hsa-mir-4474	1.68536	1.99781	0.0457368
hsa-mir-30e	0.570457	-1.99376	0.0461779
hsa-mir-1283-1	2.01094	1.98889	0.0467135
hsa-mir-5091	1.33768	1.98511	0.047132
hsa-mir-6762	0.571792	-1.98104	0.0475871
hsa-mir-221	1.33223	1.97881	0.0478374
hsa-mir-147a	2.27154	1.97822	0.0479041
hsa-mir-218-1	0.683436	-1.97336	0.0484546
hsa-mir-7641-1	1.33397	1.97327	0.0484651
hsa-mir-6782	0.371373	-1.96238	0.0497179
hsa-mir-4792	0.529962	-1.9582	0.0502071
hsa-mir-1290	5.27474	1.95417	0.0506808
hsa-mir-3166	4.64285	1.94751	0.0514741
hsa-mir-1271	0.703604	-1.94395	0.0519011
hsa-mir-376b	0.728832	-1.93743	0.0526931
hsa-mir-1257	3.89386	1.92255	0.0545368
hsa-mir-6747	1.47644	1.91394	0.0556275
hsa-mir-548s	0.717465	-1.9115	0.0559408
hsa-mir-320b-1	0.798558	-1.90716	0.0565003
hsa-mir-196b	1.13892	1.90511	0.0567659
hsa-mir-142	0.761588	-1.90404	0.0569056
hsa-mir-5572	7.03363	1.8821	0.0598228
hsa-mir-593	7.03363	1.8821	0.0598228
hsa-mir-4688	7.03363	1.8821	0.0598228
hsa-mir-133b	0.846161	-1.88083	0.0599953
hsa-mir-141	1.26348	1.87985	0.0601292
hsa-mir-222	1.32174	1.87514	0.0607733
hsa-mir-423	1.656	1.87208	0.0611961
hsa-mir-4461	1.34919	1.86896	0.0616287
hsa-mir-4682	7.23071	1.85879	0.0630562
hsa-mir-4491	0.793297	-1.85617	0.0634292
hsa-mir-3646	1.56972	1.85386	0.0637585
hsa-mir-218-2	0.702761	-1.83963	0.0658233
hsa-mir-574	0.593883	-1.8345	0.0665798
hsa-mir-5002	1.48269	1.83358	0.0667165
hsa-mir-3663	2.4676	1.82889	0.0674168
hsa-mir-937	1.21069	1.81783	0.0690903
hsa-mir-6803	0.746948	-1.81455	0.0695929
hsa-mir-3689f	23.8496	1.81325	0.0697932
hsa-mir-3668	23.8496	1.81325	0.0697932
hsa-mir-422a	23.8496	1.81325	0.0697932
hsa-mir-1248	1.23803	1.80753	0.0706796
hsa-mir-6813	0.590369	-1.80567	0.0709699
hsa-mir-766	0.645561	-1.78703	0.0739319
hsa-mir-4653	0.451268	-1.77874	0.0752832
hsa-mir-4697	1.56743	1.76862	0.0769573
hsa-mir-6847	1.75888	1.76834	0.0770035
hsa-mir-6814	0.642861	-1.76611	0.0773768
hsa-mir-509-3	1.228	1.75951	0.0784907
hsa-mir-6511b-1	1.35084	1.75722	0.0788808
hsa-mir-3655	0.705733	-1.75259	0.0796728
hsa-mir-1289-1	0.15202	-1.75098	0.0799486
hsa-mir-7108	7.16841	1.748	0.0804638
hsa-mir-198	2.49633	1.74699	0.0806395
hsa-mir-7114	1.81677	1.73691	0.0824036
hsa-mir-3921	1.8632	1.7228	0.0849239
hsa-mir-579	1.29053	1.72006	0.0854208
hsa-mir-550b-2	0.180861	-1.71432	0.0864705
hsa-mir-3160-1	3.44277	1.71083	0.0871128
hsa-mir-6882	1.37384	1.71044	0.0871846
hsa-mir-6852	0.747517	-1.70866	0.0875141
hsa-mir-492	1.6429	1.70596	0.0880158
hsa-mir-1343	1.2925	1.70129	0.088889
hsa-mir-934	1.12171	1.69833	0.0894452
hsa-mir-1285-1	0.297639	-1.69789	0.0895278
hsa-mir-95	1.28872	1.69462	0.0901475
hsa-mir-328	0.704721	-1.6911	0.0908179
hsa-mir-342	0.726295	-1.68609	0.0917779
hsa-mir-6765	6.09713	1.68596	0.0918035
hsa-mir-4776-2	6.09713	1.68596	0.0918035
hsa-mir-6841	6.09713	1.68596	0.0918035
hsa-mir-4738	1.42261	1.68395	0.0921912
hsa-mir-124-2	0.552766	-1.67068	0.0947844
hsa-mir-6750	0.612236	-1.67012	0.0948947
hsa-mir-184	1.08733	1.66896	0.0951254
hsa-mir-6836	0.336273	-1.66641	0.095631
hsa-mir-570	0.80137	-1.66032	0.0968503
hsa-mir-769	1.86582	1.65868	0.0971799
hsa-mir-653	0.762076	-1.65646	0.0976278
hsa-mir-4763	1.45984	1.64776	0.0994021
hsa-mir-6838	0.480153	-1.64058	0.100884
hsa-mir-922	2.80441	1.63797	0.101427
hsa-mir-4717	0.557571	-1.63319	0.102429
hsa-mir-3165	0.204049	-1.63078	0.102937
hsa-mir-17	1.59943	1.62855	0.103408
hsa-mir-512-1	0.510663	-1.62775	0.103577
hsa-mir-514a-2	1.19973	1.62568	0.104018
hsa-mir-5004	12.7615	1.62544	0.104068
hsa-mir-3683	12.7615	1.62544	0.104068
hsa-mir-657	12.7615	1.62544	0.104068
hsa-mir-1254-1	1.26539	1.62326	0.104534
hsa-mir-10b	0.727593	-1.61263	0.106826
hsa-mir-517c	1.40513	1.61151	0.107069
hsa-mir-493	1.62533	1.61079	0.107226
hsa-mir-3620	0.715375	-1.60751	0.107942
hsa-mir-1267	0.213072	-1.60622	0.108225
hsa-mir-6791	1.90127	1.58862	0.112146
hsa-mir-7-3	1.14171	1.58844	0.112188
hsa-mir-6794	1.82547	1.57384	0.115525
hsa-mir-4802	0.719357	-1.57323	0.115666
hsa-mir-4471	14.3238	1.57078	0.116233
hsa-mir-98	1.78673	1.56793	0.116897
hsa-mir-5090	1.27772	1.56611	0.117323
hsa-mir-889	1.37005	1.56563	0.117434
hsa-mir-425	1.32619	1.56327	0.117988
hsa-mir-197	0.620452	-1.56232	0.118212
hsa-mir-4496	0.38856	-1.555	0.119946
hsa-mir-520c	1.7521	1.55296	0.120432
hsa-mir-4444-1	0.783821	-1.55228	0.120595
hsa-mir-6780a	1.64625	1.5457	0.122177
hsa-mir-4660	0.801462	-1.54556	0.122211
hsa-mir-2110	1.23443	1.54087	0.123348
hsa-mir-514a-3	1.18662	1.53413	0.124998
hsa-mir-107	1.50111	1.52494	0.127273
hsa-mir-20a	1.38263	1.51525	0.129709
hsa-mir-4785	0.682847	-1.51362	0.130122
hsa-mir-6880	1.7365	1.51297	0.130286
hsa-mir-1827	9.4069	1.51228	0.130464
hsa-mir-4798	2.71941	1.51058	0.130897
hsa-mir-185	1.54012	1.50993	0.131061
hsa-mir-200c	1.22117	1.50876	0.13136
hsa-mir-380	1.29024	1.5003	0.133538
hsa-mir-4713	1.34501	1.49631	0.134573
hsa-mir-572	1.61632	1.48791	0.136774
hsa-mir-6839	0.666943	-1.48427	0.137738
hsa-mir-7845	0.715455	-1.48346	0.137952
hsa-mir-99b	0.719374	-1.47861	0.139245
hsa-mir-3913-2	1.36852	1.47553	0.140071
hsa-mir-2467	1.76351	1.47412	0.140449
hsa-let-7a-2	1.26723	1.47196	0.141032
hsa-mir-6088	3.97355	1.45913	0.144528
hsa-mir-588	1.68116	1.45892	0.144587
hsa-mir-3690-1	0.845464	-1.45099	0.146783
hsa-mir-3135a	3.42999	1.44646	0.148049
hsa-mir-5691	0.504246	-1.44189	0.149332
hsa-let-7e	1.21811	1.43965	0.149966
hsa-mir-3125	1.38167	1.43955	0.149994
hsa-mir-548ar	2.13452	1.43373	0.151651
hsa-mir-5582	1.46649	1.43105	0.152415
hsa-mir-3137	0.541543	-1.42788	0.153327
hsa-mir-145	0.757711	-1.42672	0.153662
hsa-mir-505	0.663408	-1.41927	0.155819
hsa-mir-1260b	0.713263	-1.41916	0.155854
hsa-mir-1238	0.200257	-1.41804	0.15618
hsa-mir-3917	0.851556	-1.4162	0.156716
hsa-mir-4729	2.4361	1.41474	0.157146
hsa-mir-210	1.10797	1.41435	0.15726
hsa-mir-4516	1.51169	1.4114	0.158126
hsa-mir-513a-1	0.230724	-1.41097	0.158254
hsa-mir-6715a	0.836062	-1.40947	0.158695
hsa-mir-190b	1.17405	1.40787	0.15917
hsa-mir-613	3.97111	1.40739	0.159311
hsa-mir-567	3.97111	1.40739	0.159311
hsa-mir-513b	0.326753	-1.40132	0.161119
hsa-mir-6790	2.98964	1.40022	0.161447
hsa-mir-6786	0.551118	-1.40013	0.161474
hsa-mir-3909	1.2066	1.394	0.163317
hsa-mir-3158-2	1.38713	1.39295	0.163634
hsa-mir-656	1.24711	1.39013	0.164489
hsa-mir-6766	1.37988	1.38973	0.164612
hsa-mir-4742	1.23509	1.3878	0.165199
hsa-mir-4723	1.56812	1.38251	0.166816
hsa-mir-5684	1.18281	1.38151	0.167122
hsa-mir-542	1.36577	1.3795	0.167741
hsa-mir-216a	1.0574	1.37518	0.169077
hsa-mir-181d	1.32174	1.3663	0.171846
hsa-mir-5586	0.857169	-1.36427	0.172483
hsa-mir-548ah	3.8394	1.36408	0.172543
hsa-mir-3688-2	1.73667	1.36361	0.172689
hsa-mir-4286	0.737368	-1.36277	0.172954
hsa-mir-4644	2.08468	1.36126	0.17343
hsa-mir-4666b	4.07079	1.35754	0.17461
hsa-mir-1302-3	4.07079	1.35754	0.17461
hsa-mir-3656	1.59938	1.35673	0.174866
hsa-mir-7849	0.27318	-1.35422	0.175667
hsa-mir-607	0.738347	-1.35221	0.176308
hsa-mir-3180-4	0.458741	-1.35051	0.176852
hsa-mir-329-2	1.2165	1.35036	0.1769
hsa-mir-139	0.839108	-1.34581	0.178364
hsa-mir-1228	0.810665	-1.34505	0.17861
hsa-mir-7110	1.39381	1.34377	0.179024
hsa-mir-6129	1.39074	1.3423	0.179499
hsa-mir-944	1.1393	1.33294	0.182553
hsa-mir-6721	1.59978	1.32867	0.183957
hsa-mir-6796	1.55185	1.32798	0.184184
hsa-mir-30c-1	1.26721	1.3252	0.185106
hsa-let-7b	1.40599	1.32069	0.186604
hsa-mir-5683	0.903215	-1.31007	0.190173
hsa-mir-3935	3.60121	1.30942	0.190393
hsa-mir-4687	1.28256	1.3091	0.190502
hsa-mir-374a	0.723666	-1.30675	0.191298
hsa-mir-96	1.16039	1.30665	0.191333
hsa-mir-7850	1.31621	1.29689	0.194668
hsa-mir-3918	0.506622	-1.29453	0.195481
hsa-mir-4677	1.45136	1.29339	0.195877
hsa-mir-6837	0.847617	-1.29083	0.196762
hsa-mir-580	1.21205	1.29032	0.196939
hsa-mir-205	1.04643	1.28723	0.198016
hsa-mir-4744	1.46498	1.2869	0.198128
hsa-mir-193a	1.35322	1.28651	0.198264
hsa-mir-4679-1	0.608726	-1.28483	0.198852
hsa-mir-6753	1.85946	1.28228	0.199743
hsa-mir-4433a	0.646994	-1.28017	0.200485
hsa-mir-5687	0.776494	-1.27923	0.200816
hsa-mir-7854	0.810656	-1.27265	0.203143
hsa-mir-6756	2.32533	1.26711	0.205118
hsa-mir-670	1.17975	1.26605	0.205496
hsa-mir-875	0.44318	-1.26564	0.205642
hsa-mir-181b-1	1.25874	1.2597	0.207778
hsa-mir-548d-1	1.41205	1.2586	0.208175
hsa-mir-196a-1	1.07738	1.25479	0.209556
hsa-mir-3192	0.711196	-1.25342	0.210053
hsa-mir-4659b	2.38002	1.24386	0.213552
hsa-mir-4635	0.266471	-1.24289	0.21391
hsa-mir-6767	0.427784	-1.24243	0.214078
hsa-mir-4699	0.592872	-1.24243	0.214079
hsa-mir-125b-1	0.745826	-1.24084	0.214664
hsa-mir-4793	1.58286	1.2346	0.216978
hsa-mir-515-2	1.44463	1.23455	0.216999
hsa-mir-15a	1.46633	1.23378	0.217285
hsa-mir-532	0.741242	-1.23298	0.217583
hsa-mir-6793	1.21062	1.22807	0.219421
hsa-mir-9-1	0.854146	-1.22705	0.219803
hsa-mir-509-1	1.15566	1.22653	0.219999
hsa-mir-196a-2	1.07262	1.22339	0.221184
hsa-mir-216b	1.04382	1.22259	0.221485
hsa-mir-106b	1.33548	1.22066	0.222216
hsa-mir-378b	1.67327	1.22049	0.222278
hsa-mir-125a	0.717764	-1.21973	0.222568
hsa-mir-3960	15.2052	1.21665	0.223736
hsa-mir-4661	1.15218	1.20669	0.227553
hsa-mir-6731	0.749033	-1.20662	0.22758
hsa-mir-3684	1.2576	1.20634	0.227687
hsa-mir-326	0.853193	-1.2055	0.228012
hsa-mir-3136	1.19549	1.2038	0.228668
hsa-mir-520d	0.621356	-1.20029	0.230028
hsa-mir-187	0.909954	-1.19872	0.230638
hsa-mir-9-3	0.862718	-1.18955	0.234222
hsa-mir-378a	0.761016	-1.18899	0.234445
hsa-mir-6757	1.38136	1.18876	0.234533
hsa-mir-3920	0.763531	-1.18714	0.235171
hsa-mir-3168	0.223865	-1.18679	0.235312
hsa-mir-3160-2	0.39635	-1.18434	0.236277
hsa-mir-193b	1.15715	1.18388	0.23646
hsa-mir-548q	1.23414	1.18191	0.237241
hsa-mir-190a	1.21695	1.18022	0.237912
hsa-mir-21	1.28453	1.17952	0.238192
hsa-mir-621	0.309879	-1.17821	0.238712
hsa-mir-1254-2	1.19169	1.17763	0.238945
hsa-mir-4768	0.816985	-1.17364	0.24054
hsa-mir-4506	0.126827	-1.17082	0.241671
hsa-mir-1284	1.21452	1.16764	0.24295
hsa-mir-337	0.726122	-1.16604	0.243597
hsa-mir-449b	1.60142	1.16594	0.24364
hsa-mir-495	0.758505	-1.16391	0.244459
hsa-mir-491	0.805395	-1.16241	0.24507
hsa-mir-1539	0.529386	-1.16195	0.245255
hsa-mir-3129	1.16714	1.16164	0.245383
hsa-mir-6878	2.01707	1.15803	0.246852
hsa-mir-137	0.899919	-1.15729	0.247154
hsa-mir-3154	0.811714	-1.15654	0.24746
hsa-mir-371b	1.29182	1.1558	0.247762
hsa-mir-6868	1.16719	1.1542	0.248419
hsa-mir-191	0.753352	-1.15389	0.248546
hsa-mir-6737	1.26102	1.15328	0.248795
hsa-mir-6084	1.47341	1.15301	0.248907
hsa-mir-548ba	0.788352	-1.15152	0.249519
hsa-mir-4774	0.5015	-1.15073	0.249843
hsa-mir-3180-2	3.09767	1.15064	0.24988
hsa-mir-4507	3.02558	1.15064	0.24988
hsa-mir-5583-2	3.09767	1.15064	0.24988
hsa-mir-146a	0.852178	-1.15028	0.250027
hsa-mir-370	0.791822	-1.15019	0.250067
hsa-mir-548w	0.242092	-1.14758	0.251142
hsa-mir-6770-1	2.2605	1.14734	0.251241
hsa-mir-4668	0.823755	-1.14602	0.251785
hsa-mir-513a-2	1.75854	1.1446	0.252373
hsa-mir-4707	0.822447	-1.14316	0.252973
hsa-mir-4803	1.71529	1.13901	0.254697
hsa-mir-4762	0.822959	-1.13801	0.255118
hsa-mir-4745	1.2987	1.13567	0.256093
hsa-mir-125b-2	0.766238	-1.13403	0.256783
hsa-mir-4734	0.690771	-1.12809	0.259282
hsa-mir-4476	0.419741	-1.12511	0.260544
hsa-mir-639	0.858512	-1.12466	0.260733
hsa-mir-642b	0.652548	-1.12337	0.261278
hsa-mir-6804	1.42456	1.12092	0.26232
hsa-mir-518b	1.21005	1.12007	0.262685
hsa-mir-1179	0.882777	-1.11969	0.262848
hsa-mir-6512	0.415537	-1.11727	0.263878
hsa-mir-5694	0.812083	-1.11427	0.265165
hsa-mir-6513	0.832964	-1.11098	0.266578
hsa-mir-592	1.1565	1.10653	0.268499
hsa-mir-181b-2	1.2203	1.10549	0.268949
hsa-mir-4781	0.849826	-1.1054	0.268988
hsa-mir-3150a	1.31386	1.10503	0.269145
hsa-mir-1246	0.521631	-1.10435	0.269442
hsa-mir-124-1	1.31681	1.10118	0.270819
hsa-mir-1199	2.89653	1.09823	0.272103
hsa-mir-6717	0.687493	-1.09709	0.272604
hsa-mir-320c-2	1.17855	1.09495	0.273539
hsa-mir-6511b-2	0.854875	-1.09456	0.273708
hsa-mir-548a-3	0.591693	-1.09431	0.273821
hsa-mir-7158	0.601748	-1.0876	0.27677
hsa-mir-4504	2.17093	1.08275	0.27892
hsa-mir-3143	1.44296	1.08206	0.279225
hsa-mir-3140	0.810855	-1.08193	0.279285
hsa-mir-3174	1.21149	1.07682	0.281561
hsa-mir-9-2	0.876055	-1.07589	0.281977
hsa-mir-5010	0.866834	-1.07587	0.281986
hsa-mir-6507	0.730457	-1.07552	0.282143
hsa-mir-4755	0.779684	-1.07343	0.283079
hsa-mir-4306	1.37252	1.0696	0.284799
hsa-mir-877	1.16258	1.06892	0.285108
hsa-mir-27b	1.25327	1.0678	0.285612
hsa-mir-369	1.2786	1.06709	0.285931
hsa-mir-6739	0.719326	-1.0648	0.286968
hsa-mir-5571	0.814594	-1.06445	0.287126
hsa-let-7g	1.23634	1.06428	0.287201
hsa-mir-3678	0.826736	-1.06415	0.287261
hsa-mir-3913-1	1.19645	1.06304	0.287765
hsa-mir-6853	1.3494	1.05422	0.291782
hsa-mir-4511	1.47527	1.05417	0.291807
hsa-let-7d	0.698307	-1.05317	0.292265
hsa-mir-6825	1.36105	1.05285	0.292411
hsa-mir-892b	0.631259	-1.05108	0.29322
hsa-mir-6734	1.2074	1.0503	0.293582
hsa-mir-548ag-2	1.21484	1.04953	0.293933
hsa-mir-4790	1.49311	1.04829	0.294503
hsa-mir-23c	1.14744	1.04634	0.295405
hsa-mir-4771-2	2.01854	1.04403	0.296473
hsa-mir-488	0.864986	-1.04379	0.296582
hsa-mir-3650	0.465346	-1.0428	0.297042
hsa-mir-6130	3.17037	1.04223	0.297307
hsa-mir-181a-1	1.27946	1.04161	0.297594
hsa-mir-3115	1.4363	1.04117	0.297796
hsa-mir-598	0.84652	-1.04098	0.297885
hsa-mir-4728	0.897993	-1.0393	0.298664
hsa-mir-30a	1.18119	1.03896	0.298823
hsa-mir-506	0.798621	-1.03735	0.299575
hsa-mir-6833	0.770743	-1.03687	0.299795
hsa-mir-551a	1.14236	1.03568	0.30035
hsa-mir-1283-2	0.645633	-1.03265	0.301768
hsa-mir-19a	1.16322	1.02769	0.304094
hsa-mir-183	1.16534	1.02719	0.304329
hsa-mir-6516	0.84171	-1.02615	0.30482
hsa-mir-6831	0.312999	-1.02528	0.305233
hsa-mir-4488	0.580761	-1.02515	0.305294
hsa-mir-4450	8.4644	1.02367	0.305991
hsa-mir-217	1.03983	1.02298	0.306318
hsa-mir-3659	2.24372	1.02204	0.306762
hsa-mir-4712	1.95132	1.02105	0.307231
hsa-mir-450b	1.20996	1.02077	0.307365
hsa-mir-3944	1.19444	1.02005	0.307706
hsa-mir-138-1	0.919202	-1.01659	0.309348
hsa-mir-4751	0.512646	-1.01328	0.310927
hsa-mir-6728	0.753423	-1.01323	0.31095
hsa-mir-6508	1.36606	1.01283	0.311141
hsa-mir-3155a	0.746436	-1.01237	0.311361
hsa-mir-500b	0.822308	-1.00948	0.312745
hsa-mir-4771-1	1.50423	1.00819	0.313362
hsa-mir-3132	1.90594	1.00637	0.314237
hsa-mir-892c	0.562953	-1.00305	0.315838
hsa-mir-4460	2.5499	1.00298	0.31587
hsa-mir-1197	0.845052	-1.00173	0.316472
hsa-mir-4748	1.31364	1.00019	0.317219
hsa-mir-609	3.138	0.998057	0.318252
hsa-mir-1294	1.18863	0.997409	0.318566
hsa-mir-4632	0.801368	-0.997085	0.318723
hsa-mir-424	1.2432	0.996692	0.318914
hsa-mir-382	1.30024	0.995136	0.31967
hsa-mir-3614	1.13178	0.992024	0.321186
hsa-mir-16-2	1.41633	0.991543	0.32142
hsa-mir-1976	0.820872	-0.990769	0.321798
hsa-mir-4753	0.775718	-0.98736	0.323466
hsa-mir-6808	1.1705	0.985529	0.324364
hsa-mir-6801	0.612456	-0.985001	0.324623
hsa-mir-3664	0.860164	-0.98342	0.325401
hsa-mir-7-2	1.08822	0.983105	0.325556
hsa-mir-27a	1.20783	0.982821	0.325695
hsa-mir-4686	3.99548	0.981975	0.326112
hsa-mir-5194	2.29894	0.981975	0.326112
hsa-mir-525	0.82401	-0.978657	0.327749
hsa-mir-6805	1.22357	0.97571	0.329208
hsa-mir-6764	1.20645	0.973432	0.330339
hsa-mir-6723	1.30118	0.972905	0.330601
hsa-mir-103a-1	1.38428	0.9712	0.331449
hsa-mir-5100	0.352315	-0.970871	0.331613
hsa-mir-4638	0.890143	-0.969815	0.332139
hsa-mir-4484	1.23586	0.968232	0.332929
hsa-mir-5093	0.311108	-0.967677	0.333206
hsa-mir-4470	0.787544	-0.963909	0.335092
hsa-mir-600	1.36779	0.962982	0.335557
hsa-mir-155	0.834837	-0.957851	0.338138
hsa-mir-4800	0.815128	-0.955463	0.339343
hsa-mir-550a-2	1.17484	0.955022	0.339566
hsa-mir-5693	0.466718	-0.9498	0.342214
hsa-mir-4446	0.810685	-0.946923	0.343678
hsa-mir-1273h	0.730386	-0.946543	0.343872
hsa-mir-346	0.85086	-0.946321	0.343985
hsa-mir-3619	1.16755	0.946003	0.344147
hsa-mir-599	0.796493	-0.941879	0.346255
hsa-mir-664b	0.780768	-0.941813	0.346288
hsa-mir-4451	0.377416	-0.939927	0.347255
hsa-mir-4776-1	1.9199	0.938721	0.347874
hsa-mir-224	1.11457	0.936758	0.348883
hsa-mir-502	0.815729	-0.936517	0.349007
hsa-mir-7705	1.12576	0.935676	0.34944
hsa-mir-2276	0.827358	-0.93554	0.34951
hsa-mir-20b	0.86384	-0.935491	0.349535
hsa-mir-6761	0.889642	-0.935467	0.349547
hsa-mir-330	0.79345	-0.934307	0.350146
hsa-mir-4520-1	1.49374	0.933408	0.350609
hsa-mir-6735	0.75921	-0.93193	0.351373
hsa-mir-3191	0.868371	-0.930573	0.352075
hsa-mir-6077	0.342187	-0.930142	0.352298
hsa-mir-372	0.823102	-0.928661	0.353065
hsa-mir-103a-2	1.36406	0.928507	0.353145
hsa-mir-1913	0.683837	-0.9269	0.353978
hsa-mir-6736	0.64356	-0.926833	0.354013
hsa-mir-6738	0.726797	-0.925487	0.354712
hsa-mir-5696	0.863497	-0.923439	0.355778
hsa-mir-3167	2.50924	0.921925	0.356568
hsa-mir-5689	2.50924	0.921925	0.356568
hsa-mir-7852	1.78971	0.921925	0.356568
hsa-mir-6788	0.845314	-0.921301	0.356893
hsa-mir-1256	1.29604	0.919792	0.357682
hsa-mir-577	0.927053	-0.919424	0.357874
hsa-mir-6851	1.22061	0.917959	0.35864
hsa-mir-34a	0.778646	-0.91664	0.359331
hsa-mir-3146	1.53426	0.916204	0.35956
hsa-mir-767	1.09439	0.914922	0.360233
hsa-mir-411	1.30416	0.914919	0.360234
hsa-mir-3929	2.02766	0.913985	0.360725
hsa-mir-3680-1	0.828323	-0.91366	0.360895
hsa-mir-6874	1.14949	0.912252	0.361636
hsa-mir-7111	1.52801	0.910677	0.362465
hsa-mir-503	1.14264	0.90808	0.363836
hsa-mir-3605	0.856986	-0.907694	0.36404
hsa-mir-521-1	1.50314	0.905886	0.364996
hsa-mir-938	0.748569	-0.9051	0.365413
hsa-mir-6815	0.857408	-0.902646	0.366714
hsa-mir-362	0.843857	-0.902505	0.366789
hsa-mir-3667	0.795709	-0.900975	0.367602
hsa-mir-4482	0.790886	-0.900416	0.367899
hsa-mir-1911	1.1371	0.900365	0.367926
hsa-mir-1193	1.36218	0.899345	0.368469
hsa-mir-4498	0.529366	-0.897887	0.369246
hsa-mir-6873	0.618654	-0.897582	0.369409
hsa-mir-7112	0.818316	-0.896023	0.37024
hsa-mir-6816	0.404076	-0.893689	0.371488
hsa-mir-4515	1.3144	0.891494	0.372664
hsa-mir-4999	0.898862	-0.890636	0.373124
hsa-mir-654	0.838205	-0.890245	0.373334
hsa-mir-522	0.86939	-0.888902	0.374056
hsa-mir-515-1	1.28258	0.888727	0.37415
hsa-mir-3943	1.171	0.888201	0.374433
hsa-mir-136	1.2275	0.88605	0.37559
hsa-mir-1243	1.24546	0.883018	0.377226
hsa-mir-578	1.25108	0.879754	0.378992
hsa-mir-4760	0.449647	-0.877498	0.380216
hsa-mir-3150b	0.914711	-0.877213	0.380371
hsa-mir-658	0.858335	-0.876836	0.380576
hsa-mir-1181	0.858491	-0.876528	0.380743
hsa-mir-615	0.917743	-0.871998	0.38321
hsa-mir-4651	0.686375	-0.869877	0.384368
hsa-mir-378d-1	1.14861	0.868767	0.384975
hsa-mir-296	0.842633	-0.865751	0.386627
hsa-mir-1287	1.24477	0.861462	0.388984
hsa-mir-611	1.47405	0.860786	0.389356
hsa-mir-518a-1	0.74997	-0.85936	0.390142
hsa-mir-8072	0.81378	-0.858671	0.390522
hsa-mir-4669	0.429212	-0.855794	0.392112
hsa-mir-4767	1.57792	0.855709	0.392158
hsa-mir-6720	1.11883	0.85509	0.392502
hsa-mir-7976	0.819969	-0.852371	0.394008
hsa-mir-4469	0.841459	-0.851287	0.39461
hsa-mir-6846	1.69246	0.850791	0.394886
hsa-mir-6895	0.8212	-0.848993	0.395885
hsa-mir-28	0.782061	-0.848958	0.395905
hsa-mir-643	1.15076	0.847302	0.396827
hsa-mir-130b	1.11306	0.846767	0.397125
hsa-mir-4766	1.14483	0.846299	0.397386
hsa-mir-4326	1.06527	0.844496	0.398392
hsa-mir-3689a	2.20579	0.844225	0.398544
hsa-mir-921	2.20579	0.844225	0.398544
hsa-mir-4649	1.12701	0.840687	0.400523
hsa-mir-510	1.79763	0.835328	0.403533
hsa-mir-4530	1.4957	0.835281	0.40356
hsa-mir-4786	1.14106	0.834627	0.403928
hsa-mir-3652	1.11135	0.834527	0.403984
hsa-mir-4756	1.18598	0.833471	0.404579
hsa-mir-1286	0.599437	-0.833358	0.404643
hsa-mir-4674	1.28788	0.832754	0.404983
hsa-mir-497	0.807103	-0.831804	0.405519
hsa-mir-6755	0.875626	-0.831193	0.405865
hsa-mir-760	1.11053	0.830804	0.406084
hsa-mir-6787	1.22845	0.827063	0.408201
hsa-mir-148b	1.26425	0.8268	0.40835
hsa-mir-2116	1.11451	0.823948	0.409969
hsa-mir-4480	1.64505	0.822988	0.410515
hsa-mir-4641	0.612997	-0.820632	0.411856
hsa-mir-3195	0.862861	-0.819302	0.412614
hsa-mir-1296	1.13909	0.818519	0.413061
hsa-mir-3926-2	0.897455	-0.815287	0.414908
hsa-mir-3681	0.687125	-0.813154	0.41613
hsa-mir-1236	0.438112	-0.812608	0.416443
hsa-mir-5094	0.682295	-0.812336	0.416599
hsa-mir-1295a	0.901045	-0.810941	0.417399
hsa-mir-3662	1.16056	0.810176	0.417839
hsa-mir-4695	0.535813	-0.808611	0.418739
hsa-mir-5190	0.343819	-0.803433	0.421724
hsa-mir-6754	1.24856	0.798023	0.424857
hsa-mir-153-2	0.908822	-0.797758	0.425011
hsa-mir-548av	1.35343	0.791812	0.42847
hsa-mir-3610	0.902634	-0.787962	0.430719
hsa-mir-93	1.19948	0.787497	0.430991
hsa-mir-586	1.47783	0.785302	0.432277
hsa-mir-876	1.17583	0.784478	0.43276
hsa-mir-323a	1.1343	0.783251	0.43348
hsa-mir-3198-1	0.694806	-0.781919	0.434262
hsa-mir-5703	1.13462	0.780581	0.435049
hsa-mir-614	1.22461	0.778382	0.436344
hsa-mir-6776	0.685983	-0.777427	0.436907
hsa-mir-6733	0.878574	-0.776239	0.437608
hsa-mir-6800	1.36063	0.774951	0.438369
hsa-mir-4489	1.38338	0.7738	0.439049
hsa-mir-3927	1.94493	0.773713	0.439101
hsa-mir-7151	1.19015	0.773049	0.439494
hsa-mir-6867	0.585905	-0.771957	0.44014
hsa-mir-7846	0.874162	-0.770996	0.440709
hsa-mir-675	0.933785	-0.770371	0.44108
hsa-mir-215	0.952654	-0.770049	0.441271
hsa-mir-6730	0.879229	-0.767946	0.44252
hsa-mir-573	1.21864	0.765376	0.444047
hsa-mir-6859-4	3.43764	0.764454	0.444597
hsa-mir-4453	0.84695	-0.764229	0.444731
hsa-mir-4503	1.5532	0.761801	0.446179
hsa-mir-6797	0.790316	-0.761718	0.446228
hsa-mir-6869	1.49686	0.760006	0.447251
hsa-mir-33a	0.901841	-0.758967	0.447872
hsa-mir-4657	1.19537	0.757793	0.448575
hsa-mir-7-1	0.878623	-0.755914	0.449701
hsa-mir-3609	0.826785	-0.755593	0.449893
hsa-mir-4685	1.12449	0.754694	0.450433
hsa-mir-770	0.891005	-0.754461	0.450572
hsa-mir-3170	0.888718	-0.753675	0.451044
hsa-mir-3124	0.804204	-0.753288	0.451277
hsa-mir-3190	1.1321	0.753148	0.451361
hsa-mir-192	0.928944	-0.752875	0.451525
hsa-mir-33b	1.1121	0.752534	0.45173
hsa-mir-935	1.04847	0.75249	0.451757
hsa-mir-892a	1.11471	0.7516	0.452292
hsa-mir-6125	0.884377	-0.751233	0.452513
hsa-mir-1301	0.82732	-0.750797	0.452775
hsa-mir-511	0.918649	-0.746785	0.455193
hsa-mir-181c	1.22253	0.745834	0.455768
hsa-mir-7704	0.467873	-0.74469	0.456459
hsa-mir-516b-2	0.734152	-0.743954	0.456904
hsa-mir-4804	1.3569	0.742101	0.458026
hsa-mir-4539	1.68443	0.741271	0.458529
hsa-mir-6819	1.54138	0.741062	0.458656
hsa-mir-5706	0.882184	-0.740593	0.45894
hsa-mir-4671	0.391579	-0.74056	0.45896
hsa-mir-494	1.11324	0.737744	0.46067
hsa-mir-6866	1.39201	0.737333	0.46092
hsa-mir-6820	1.10853	0.73309	0.463503
hsa-mir-6892	0.907677	-0.732961	0.463582
hsa-mir-550b-1	0.667956	-0.731627	0.464396
hsa-mir-4636	1.11839	0.731456	0.464501
hsa-mir-6888	0.759217	-0.731266	0.464617
hsa-mir-3148	0.457579	-0.730822	0.464888
hsa-mir-19b-1	1.13767	0.730405	0.465143
hsa-mir-4254	0.72948	-0.729432	0.465738
hsa-mir-6887	1.17378	0.728265	0.466452
hsa-mir-4505	0.780905	-0.727691	0.466803
hsa-mir-4750	0.68549	-0.727106	0.467161
hsa-mir-6879	0.846714	-0.72677	0.467367
hsa-mir-4683	0.858922	-0.726414	0.467585
hsa-mir-182	1.12035	0.725192	0.468334
hsa-mir-4758	1.13387	0.724749	0.468606
hsa-mir-6515	1.18678	0.723258	0.469521
hsa-mir-206	0.897859	-0.721942	0.47033
hsa-mir-4703	1.25745	0.721349	0.470695
hsa-mir-4726	1.17695	0.719938	0.471563
hsa-mir-18b	0.918275	-0.715204	0.474483
hsa-mir-5702	1.56855	0.714834	0.474712
hsa-mir-3591	1.25696	0.713728	0.475395
hsa-mir-3940	1.10663	0.71213	0.476385
hsa-mir-1270	1.11746	0.71166	0.476675
hsa-mir-499a	1.11173	0.708987	0.478332
hsa-mir-26b	0.867912	-0.708749	0.47848
hsa-mir-31	1.05224	0.708489	0.478642
hsa-mir-3937	1.84624	0.708161	0.478845
hsa-mir-603	0.635058	-0.708107	0.478879
hsa-mir-5695	0.822944	-0.70678	0.479703
hsa-mir-4642	1.91044	0.704821	0.480921
hsa-mir-4708	1.25202	0.702654	0.482271
hsa-mir-581	0.900983	-0.699053	0.484519
hsa-mir-5193	0.881651	-0.697512	0.485482
hsa-mir-636	1.13587	0.694925	0.487102
hsa-mir-3181	0.703087	-0.693174	0.4882
hsa-mir-4797	1.12301	0.692882	0.488384
hsa-mir-942	0.889489	-0.691624	0.489173
hsa-mir-655	0.874222	-0.691391	0.48932
hsa-mir-1269b	1.08151	0.690377	0.489957
hsa-mir-5000	0.892364	-0.690063	0.490155
hsa-mir-3156-2	1.36842	0.689294	0.490638
hsa-mir-5092	1.18565	0.687874	0.491532
hsa-mir-4675	0.689538	-0.687131	0.492
hsa-mir-4443	0.902407	-0.687027	0.492066
hsa-mir-301a	1.18564	0.68638	0.492474
hsa-mir-4673	0.710419	-0.684451	0.493691
hsa-mir-128-1	1.24269	0.682	0.495239
hsa-mir-5581	1.14671	0.68076	0.496024
hsa-mir-7156	1.08825	0.680475	0.496204
hsa-mir-6843	1.14889	0.680086	0.49645
hsa-mir-203a	1.06971	0.679171	0.49703
hsa-mir-4492	1.17884	0.678661	0.497353
hsa-mir-1298	1.19393	0.677583	0.498036
hsa-mir-101-2	0.838233	-0.677087	0.498351
hsa-mir-3661	1.43444	0.676004	0.499038
hsa-mir-3934	1.11074	0.673538	0.500605
hsa-mir-3121	0.655833	-0.673196	0.500822
hsa-mir-1295b	0.87888	-0.671757	0.501738
hsa-mir-6870	1.17049	0.6708	0.502348
hsa-mir-133a-2	0.934395	-0.670718	0.5024
hsa-mir-548y	1.28585	0.67051	0.502532
hsa-mir-6773	1.29354	0.66937	0.503259
hsa-mir-200b	1.08837	0.669053	0.503462
hsa-mir-16-1	1.27114	0.668995	0.503499
hsa-mir-3126	1.13307	0.667339	0.504556
hsa-mir-526b	1.06414	0.666607	0.505023
hsa-mir-140	0.847513	-0.66439	0.506441
hsa-mir-4773-2	1.14914	0.662212	0.507836
hsa-mir-6080	0.565496	-0.661801	0.508098
hsa-mir-101-1	0.841848	-0.661388	0.508364
hsa-mir-3194	1.10809	0.658635	0.51013
hsa-mir-6860	0.871483	-0.657692	0.510736
hsa-mir-3926-1	1.097	0.656372	0.511585
hsa-mir-410	1.11329	0.651363	0.514812
hsa-mir-548ax	0.52554	-0.649926	0.51574
hsa-mir-744	0.851749	-0.649848	0.515791
hsa-mir-5708	1.28227	0.649759	0.515848
hsa-mir-6812	1.23386	0.649265	0.516167
hsa-mir-512-2	0.831853	-0.648394	0.51673
hsa-mir-130a	1.21396	0.648195	0.516859
hsa-mir-5697	1.21228	0.647973	0.517002
hsa-mir-548at	1.25635	0.647279	0.517451
hsa-mir-3127	1.12819	0.646352	0.518051
hsa-mir-663b	2.31749	0.645693	0.518478
hsa-mir-105-2	1.0798	0.645078	0.518877
hsa-mir-4788	1.10093	0.641596	0.521136
hsa-mir-6834	1.171	0.638125	0.523392
hsa-mir-1250	1.16289	0.637935	0.523516
hsa-mir-650	0.574048	-0.635354	0.525197
hsa-mir-941-1	1.43309	0.634846	0.525529
hsa-mir-6509	0.925098	-0.632944	0.52677
hsa-mir-5008	0.813064	-0.632803	0.526862
hsa-mir-6894	0.870405	-0.632395	0.527129
hsa-mir-5196	1.70957	0.632283	0.527202
hsa-mir-3945	0.810929	-0.631948	0.527421
hsa-mir-6781	1.14226	0.631729	0.527564
hsa-mir-2278	1.18747	0.631145	0.527946
hsa-mir-29c	0.917791	-0.630397	0.528435
hsa-mir-6726	0.85841	-0.629891	0.528766
hsa-mir-3187	0.898013	-0.628683	0.529557
hsa-mir-1265	0.597179	-0.627209	0.530522
hsa-mir-6806	1.09816	0.624346	0.5324
hsa-mir-5680	0.893965	-0.6228	0.533416
hsa-mir-143	1.12509	0.622679	0.533495
hsa-mir-6802	1.1003	0.622456	0.533642
hsa-mir-6889	1.50212	0.620074	0.535209
hsa-mir-548ag-1	1.67549	0.619356	0.535682
hsa-mir-4796	1.11029	0.615449	0.538258
hsa-mir-548as	0.557844	-0.612323	0.540324
hsa-mir-513c	1.14876	0.612154	0.540436
hsa-mir-4650-1	0.654202	-0.612102	0.54047
hsa-mir-1277	0.930378	-0.610882	0.541278
hsa-mir-4487	0.794556	-0.609362	0.542284
hsa-mir-1282	2.09702	0.607546	0.543489
hsa-mir-3151	2.09702	0.607546	0.543489
hsa-mir-8059	1.57487	0.607546	0.543489
hsa-mir-3197	2.09702	0.607546	0.543489
hsa-mir-548e	0.919192	-0.607239	0.543692
hsa-mir-34c	0.92085	-0.605304	0.544977
hsa-mir-1292	0.911446	-0.60227	0.546994
hsa-mir-3196	0.814321	-0.601016	0.547829
hsa-mir-4736	1.13306	0.60043	0.548219
hsa-mir-4517	0.824331	-0.598673	0.549391
hsa-mir-664a	0.849276	-0.594593	0.552116
hsa-mir-652	1.13391	0.589593	0.555463
hsa-mir-584	1.08182	0.58803	0.556512
hsa-mir-4434	0.867803	-0.587199	0.55707
hsa-mir-1237	1.14911	0.585796	0.558012
hsa-mir-15b	1.12721	0.585598	0.558145
hsa-mir-4425	0.694856	-0.584259	0.559046
hsa-mir-7161	1.27736	0.582771	0.560048
hsa-mir-340	1.13669	0.580981	0.561253
hsa-mir-320a	0.871695	-0.580899	0.561308
hsa-mir-874	0.859218	-0.579875	0.561999
hsa-mir-6884	1.16755	0.578023	0.563249
hsa-mir-4525	1.12247	0.577696	0.563469
hsa-mir-6844	1.14558	0.577229	0.563785
hsa-mir-4646	1.32817	0.576162	0.564505
hsa-mir-4501	0.923482	-0.573339	0.566415
hsa-mir-6845	1.2332	0.573078	0.566592
hsa-mir-548b	1.07731	0.572797	0.566782
hsa-mir-4659a	0.797871	-0.571248	0.567831
hsa-mir-1305	0.925204	-0.570957	0.568029
hsa-mir-324	0.82722	-0.5684	0.569763
hsa-mir-1288	0.926309	-0.56798	0.570049
hsa-mir-3679	1.12561	0.56783	0.57015
hsa-mir-22	0.846944	-0.567513	0.570366
hsa-mir-378f	0.887087	-0.567019	0.570702
hsa-mir-23a	1.18056	0.565908	0.571457
hsa-mir-662	1.15469	0.565044	0.572044
hsa-mir-520g	0.828826	-0.563437	0.573138
hsa-mir-3912	1.09171	0.561418	0.574512
hsa-mir-376a-2	0.924744	-0.561114	0.57472
hsa-mir-4494	0.722012	-0.559804	0.575613
hsa-mir-4654	1.18899	0.55874	0.576339
hsa-mir-6798	1.0944	0.558717	0.576355
hsa-mir-758	1.14105	0.557688	0.577057
hsa-mir-148a	0.937064	-0.55745	0.57722
hsa-mir-7113	0.858408	-0.556513	0.57786
hsa-mir-612	1.17759	0.555232	0.578736
hsa-mir-6891	0.850333	-0.554575	0.579186
hsa-mir-3657	1.1969	0.553608	0.579847
hsa-mir-6729	1.24097	0.549657	0.582554
hsa-mir-194-2	0.948639	-0.549417	0.582719
hsa-mir-548o	0.919995	-0.548447	0.583385
hsa-mir-1252	1.34989	0.54813	0.583603
hsa-mir-3139	0.771895	-0.545766	0.585227
hsa-mir-5189	0.80948	-0.545538	0.585384
hsa-mir-194-1	0.949545	-0.545295	0.58555
hsa-mir-516b-1	1.16741	0.544374	0.586184
hsa-mir-4637	0.719703	-0.543045	0.587098
hsa-mir-4731	0.782325	-0.541947	0.587855
hsa-mir-301b	1.06673	0.540627	0.588765
hsa-mir-3120	2.02205	0.538712	0.590085
hsa-mir-3064	1.08568	0.537806	0.590711
hsa-mir-4662a	1.07247	0.537758	0.590744
hsa-mir-199b	1.17428	0.536249	0.591787
hsa-mir-3692	0.553983	-0.536133	0.591866
hsa-mir-1225	0.853827	-0.534379	0.593079
hsa-mir-7702	0.94604	-0.533341	0.593798
hsa-mir-4780	0.901103	-0.532968	0.594056
hsa-mir-4322	0.662703	-0.532478	0.594395
hsa-mir-4716	1.2191	0.532173	0.594606
hsa-mir-548o-2	1.07892	0.532006	0.594722
hsa-mir-4672	1.3072	0.531369	0.595163
hsa-mir-4647	1.15245	0.530993	0.595424
hsa-mir-671	1.14045	0.530862	0.595514
hsa-mir-3074	0.914659	-0.53032	0.59589
hsa-mir-548au	1.11435	0.528016	0.597488
hsa-mir-548l	1.16473	0.527004	0.598191
hsa-mir-1229	0.933664	-0.526952	0.598227
hsa-mir-3131	0.950506	-0.525817	0.599015
hsa-mir-641	1.09274	0.523432	0.600674
hsa-mir-199a-2	1.16663	0.521618	0.601936
hsa-mir-5699	0.922139	-0.517208	0.605011
hsa-mir-7703	1.2442	0.514751	0.606727
hsa-mir-135a-2	0.957503	-0.514229	0.607092
hsa-mir-616	0.923771	-0.513544	0.607571
hsa-mir-4454	0.898216	-0.513231	0.60779
hsa-mir-4706	0.579211	-0.512925	0.608004
hsa-mir-5187	0.924814	-0.511962	0.608678
hsa-mir-7848	1.39152	0.509541	0.610373
hsa-mir-4746	1.07947	0.50854	0.611075
hsa-mir-4436b-1	1.42523	0.508507	0.611098
hsa-mir-585	1.06234	0.50849	0.61111
hsa-mir-2277	0.932007	-0.508381	0.611186
hsa-mir-1245b	1.1395	0.507788	0.611602
hsa-mir-450a-1	1.0832	0.507605	0.611731
hsa-mir-203b	1.04966	0.50634	0.612618
hsa-mir-3615	0.911807	-0.505856	0.612958
hsa-mir-548v	0.937894	-0.5058	0.612997
hsa-mir-2114	1.04992	0.505088	0.613497
hsa-mir-1914	0.796266	-0.504641	0.613811
hsa-mir-1180	1.11452	0.500697	0.616584
hsa-mir-4478	0.561553	-0.499848	0.617182
hsa-mir-199a-1	1.15753	0.498639	0.618034
hsa-mir-548aq	0.786936	-0.498504	0.618129
hsa-mir-432	1.08853	0.497906	0.618551
hsa-mir-6862-2	1.39923	0.497095	0.619122
hsa-mir-2355	0.899164	-0.49667	0.619422
hsa-mir-520h	0.833316	-0.496405	0.619608
hsa-mir-516a-1	1.06387	0.496131	0.619802
hsa-mir-550a-1	0.937484	-0.494276	0.621111
hsa-mir-92b	1.10644	0.491236	0.62326
hsa-mir-629	1.13556	0.490396	0.623853
hsa-mir-551b	0.960403	-0.488051	0.625513
hsa-mir-5698	0.948887	-0.4861	0.626896
hsa-mir-99a	0.946397	-0.483457	0.628771
hsa-mir-30b	1.07591	0.483315	0.628872
hsa-mir-3911	1.14803	0.481254	0.630336
hsa-mir-4430	0.771309	-0.481242	0.630345
hsa-mir-4423	1.07433	0.480906	0.630583
hsa-mir-514a-1	0.950931	-0.480089	0.631164
hsa-mir-1275	0.92384	-0.479579	0.631527
hsa-mir-6510	0.948565	-0.477831	0.63277
hsa-mir-890	0.762749	-0.477008	0.633356
hsa-mir-105-1	1.05981	0.476928	0.633414
hsa-mir-4795	1.11005	0.474532	0.635121
hsa-mir-302a	0.886393	-0.474322	0.635271
hsa-mir-7844	0.915514	-0.474051	0.635464
hsa-mir-429	1.05135	0.472757	0.636386
hsa-mir-8085	0.507507	-0.472442	0.636612
hsa-mir-6073	0.766339	-0.471841	0.63704
hsa-mir-320e	1.12406	0.470402	0.638068
hsa-mir-3607	1.08109	0.470227	0.638193
hsa-mir-6856	1.24681	0.469968	0.638378
hsa-mir-6743	1.18648	0.469172	0.638946
hsa-mir-1185-1	0.933345	-0.467521	0.640127
hsa-mir-6715b	1.06574	0.467453	0.640176
hsa-mir-555	1.34394	0.467071	0.640449
hsa-mir-606	1.1953	0.463517	0.642994
hsa-mir-431	0.912121	-0.463073	0.643312
hsa-mir-3116-2	1.23845	0.463065	0.643318
hsa-mir-144	1.04292	0.462075	0.644028
hsa-mir-4533	1.14968	0.460502	0.645156
hsa-mir-4735	1.12531	0.46031	0.645294
hsa-mir-412	1.03718	0.46028	0.645316
hsa-mir-200a	1.06653	0.460156	0.645404
hsa-mir-452	1.1034	0.459704	0.645729
hsa-mir-632	0.939981	-0.459544	0.645843
hsa-mir-517a	1.04141	0.45953	0.645854
hsa-mir-517b	1.04141	0.45953	0.645854
hsa-mir-135b	1.04328	0.459381	0.645961
hsa-mir-34b	0.937519	-0.45895	0.64627
hsa-mir-3173	0.939479	-0.456852	0.647777
hsa-mir-5003	0.928195	-0.456371	0.648123
hsa-mir-3188	1.11104	0.454165	0.64971
hsa-mir-335	0.925213	-0.453875	0.649919
hsa-mir-576	1.11013	0.453271	0.650353
hsa-mir-4727	1.09521	0.452278	0.651069
hsa-mir-1537	1.07688	0.451701	0.651485
hsa-mir-516a-2	1.06468	0.45122	0.651831
hsa-mir-3910-2	1.11236	0.450308	0.652489
hsa-mir-6817	0.826274	-0.448947	0.65347
hsa-mir-219a-1	0.933647	-0.447255	0.654691
hsa-mir-3688-1	0.776643	-0.445572	0.655906
hsa-mir-5585	0.748403	-0.443819	0.657174
hsa-mir-541	0.935233	-0.442744	0.657951
hsa-mir-4433b	1.1631	0.440347	0.659686
hsa-mir-3616	1.11049	0.440308	0.659714
hsa-mir-3130-2	1.0435	0.43983	0.66006
hsa-mir-135a-1	1.03717	0.436051	0.6628
hsa-mir-181a-2	1.11647	0.431737	0.665933
hsa-mir-6854	1.05736	0.431432	0.666154
hsa-mir-202	0.963313	-0.431398	0.666179
hsa-mir-4466	0.882127	-0.431113	0.666386
hsa-mir-545	1.06373	0.428491	0.668294
hsa-mir-5087	1.38283	0.428476	0.668305
hsa-mir-4779	0.759917	-0.428259	0.668463
hsa-mir-4422	1.13699	0.427802	0.668795
hsa-mir-1303	1.14129	0.427787	0.668806
hsa-mir-888	1.07226	0.427163	0.669261
hsa-mir-6772	0.911568	-0.4265	0.669743
hsa-mir-106a	1.07524	0.423802	0.671711
hsa-mir-3923	1.07764	0.423096	0.672225
hsa-mir-504	0.947599	-0.422307	0.672801
hsa-mir-589	1.12741	0.42208	0.672966
hsa-mir-4421	0.869003	-0.422035	0.672999
hsa-mir-1-1	1.03735	0.419876	0.674576
hsa-mir-4679-2	1.15646	0.41705	0.676642
hsa-mir-30d	1.10379	0.416537	0.677017
hsa-mir-320b-2	1.06261	0.414726	0.678342
hsa-mir-373	1.14152	0.413861	0.678976
hsa-mir-302c	1.19574	0.413764	0.679047
hsa-mir-548t	1.08678	0.412456	0.680005
hsa-mir-3133	1.13464	0.412412	0.680038
hsa-mir-651	1.08066	0.412128	0.680246
hsa-mir-6858	1.17292	0.411916	0.680401
hsa-mir-6763	0.895049	-0.411431	0.680757
hsa-mir-320c-1	0.944762	-0.41067	0.681315
hsa-mir-5587	0.741611	-0.409922	0.681863
hsa-mir-1262	1.05937	0.407084	0.683946
hsa-mir-124-3	1.11467	0.405736	0.684937
hsa-mir-548ai	1.19641	0.405318	0.685244
hsa-mir-6759	1.26104	0.404234	0.686041
hsa-mir-323b	0.955605	-0.401545	0.688019
hsa-mir-6876	0.787002	-0.401159	0.688303
hsa-mir-4681	0.566692	-0.401112	0.688338
hsa-mir-3176	1.08635	0.400867	0.688518
hsa-mir-4784	0.927372	-0.39954	0.689495
hsa-mir-3128	0.874565	-0.398424	0.690318
hsa-mir-6727	0.815611	-0.396675	0.691607
hsa-mir-26a-1	0.860228	-0.395982	0.692118
hsa-mir-708	1.06498	0.395414	0.692537
hsa-mir-449c	1.21532	0.394659	0.693095
hsa-mir-498	1.21845	0.394458	0.693243
hsa-mir-519a-2	0.950904	-0.394416	0.693274
hsa-mir-409	0.9046	-0.393807	0.693723
hsa-mir-939	0.948689	-0.393569	0.6939
hsa-mir-7974	0.927106	-0.393512	0.693942
hsa-mir-4445	1.25763	0.393168	0.694196
hsa-mir-122	1.04199	0.392995	0.694324
hsa-mir-524	0.795116	-0.392727	0.694521
hsa-mir-627	1.06117	0.391462	0.695456
hsa-mir-3152	0.920722	-0.389248	0.697092
hsa-mir-6886	1.11155	0.388756	0.697457
hsa-mir-4520-2	1.25872	0.388592	0.697578
hsa-mir-4640	1.06214	0.388303	0.697792
hsa-mir-19b-2	1.06337	0.388095	0.697945
hsa-mir-378g	0.835068	-0.387873	0.69811
hsa-mir-4705	0.919042	-0.387347	0.698499
hsa-mir-6769a	1.14001	0.387184	0.69862
hsa-mir-624	1.04908	0.386062	0.699451
hsa-mir-665	1.05268	0.385666	0.699744
hsa-mir-320d-1	0.942214	-0.384962	0.700265
hsa-mir-92a-1	1.11645	0.383088	0.701655
hsa-mir-4479	1.07982	0.382637	0.701989
hsa-mir-449a	0.924376	-0.382602	0.702015
hsa-mir-4452	0.812147	-0.381418	0.702893
hsa-mir-195	0.916489	-0.381338	0.702953
hsa-mir-6740	0.897492	-0.381272	0.703001
hsa-mir-6504	0.843252	-0.380754	0.703386
hsa-mir-3180-1	1.95425	0.378299	0.705209
hsa-mir-6768	1.95425	0.378299	0.705209
hsa-mir-1322	1.95425	0.378299	0.705209
hsa-mir-367	1.95425	0.378299	0.705209
hsa-mir-4518	1.95425	0.378299	0.705209
hsa-mir-3199-2	0.949385	-0.376725	0.706378
hsa-mir-6849	0.819678	-0.37656	0.706501
hsa-mir-223	0.955294	-0.375516	0.707277
hsa-mir-1266	1.05102	0.375455	0.707322
hsa-mir-484	0.883154	-0.372851	0.709259
hsa-mir-448	0.713924	-0.372739	0.709343
hsa-mir-134	0.925458	-0.37212	0.709803
hsa-mir-6751	0.893574	-0.371751	0.710078
hsa-mir-4442	1.0638	0.371559	0.710222
hsa-mir-518c	0.942243	-0.371373	0.710359
hsa-mir-5588	1.06509	0.369106	0.712048
hsa-mir-5682	1.11227	0.368293	0.712655
hsa-mir-32	1.06792	0.367561	0.7132
hsa-mir-3617	0.930317	-0.366194	0.71422
hsa-mir-486-2	1.04016	0.365144	0.715004
hsa-mir-4749	1.12585	0.364933	0.715161
hsa-mir-4532	1.28378	0.364699	0.715336
hsa-mir-4787	0.950315	-0.364577	0.715427
hsa-mir-100	0.959429	-0.364399	0.71556
hsa-mir-138-2	0.970467	-0.363778	0.716024
hsa-mir-23b	1.11996	0.363615	0.716145
hsa-mir-486-1	1.03966	0.362174	0.717222
hsa-mir-26a-2	0.870355	-0.361681	0.717591
hsa-mir-379	0.914364	-0.361347	0.71784
hsa-mir-6826	1.11448	0.360208	0.718691
hsa-mir-455	1.06278	0.359841	0.718966
hsa-mir-520f	1.23027	0.358026	0.720324
hsa-mir-582	1.06288	0.35625	0.721653
hsa-mir-4794	1.13851	0.355486	0.722225
hsa-mir-5579	0.945949	-0.354247	0.723154
hsa-mir-454	1.08489	0.354025	0.72332
hsa-mir-487b	1.06923	0.353874	0.723433
hsa-mir-544b	0.907985	-0.353831	0.723466
hsa-mir-4752	0.844571	-0.353076	0.724031
hsa-mir-544a	1.05983	0.348218	0.727677
hsa-mir-3919	1.19367	0.347294	0.72837
hsa-mir-363	0.954475	-0.346695	0.728821
hsa-mir-29b-2	1.05698	0.346638	0.728863
hsa-mir-6132	0.915632	-0.346619	0.728877
hsa-mir-628	0.929456	-0.346386	0.729053
hsa-mir-548ay	0.902248	-0.346299	0.729118
hsa-mir-4519	1.10113	0.345878	0.729434
hsa-mir-3612	0.859698	-0.345356	0.729827
hsa-mir-7152	0.904122	-0.343155	0.731482
hsa-mir-3925	1.15187	0.342082	0.732289
hsa-mir-5001	0.95403	-0.341405	0.732799
hsa-mir-1276	1.08001	0.3411	0.733029
hsa-mir-3186	0.871562	-0.340887	0.733189
hsa-mir-152	1.0914	0.340108	0.733775
hsa-mir-3183	1.08606	0.339563	0.734186
hsa-mir-6770-2	1.44044	0.339503	0.734231
hsa-mir-2113	0.850729	-0.337511	0.735732
hsa-mir-548f-1	1.14353	0.336681	0.736357
hsa-mir-6784	1.13288	0.336401	0.736568
hsa-mir-6774	1.09627	0.334757	0.737809
hsa-mir-6862-1	0.822353	-0.333025	0.739115
hsa-mir-6872	1.17263	0.332802	0.739283
hsa-mir-4667	0.883144	-0.332722	0.739344
hsa-mir-1251	0.970344	-0.331634	0.740166
hsa-mir-466	0.895074	-0.330081	0.741339
hsa-mir-4634	0.748914	-0.329277	0.741946
hsa-mir-204	0.969139	-0.329242	0.741973
hsa-mir-6779	0.906972	-0.328913	0.742222
hsa-mir-1255a	1.04149	0.328238	0.742732
hsa-mir-212	1.06056	0.328184	0.742773
hsa-mir-3658	1.2065	0.327551	0.743251
hsa-mir-668	0.953432	-0.327514	0.743279
hsa-mir-329-1	0.952144	-0.326037	0.744396
hsa-mir-5009	0.905561	-0.325943	0.744468
hsa-mir-4522	0.943085	-0.325114	0.745095
hsa-mir-4799	1.26903	0.324461	0.745589
hsa-mir-4791	1.06032	0.324221	0.745771
hsa-mir-6770-3	1.35377	0.324152	0.745823
hsa-mir-548aw	1.05056	0.32308	0.746635
hsa-mir-520e	1.20794	0.32257	0.747021
hsa-mir-6500	1.75825	0.321815	0.747593
hsa-mir-765	1.06253	0.321452	0.747868
hsa-mir-936	1.26972	0.319705	0.749192
hsa-mir-3065	1.03938	0.318981	0.749741
hsa-mir-4665	0.929138	-0.318879	0.749818
hsa-mir-6855	0.925093	-0.317174	0.751111
hsa-mir-4691	1.08649	0.316496	0.751626
hsa-mir-6875	1.06582	0.316268	0.751799
hsa-mir-496	0.940176	-0.315327	0.752513
hsa-mir-3682	1.04661	0.315115	0.752675
hsa-mir-3691	0.944833	-0.312377	0.754754
hsa-mir-6885	0.908569	-0.310945	0.755842
hsa-mir-4696	1.21436	0.309622	0.756848
hsa-mir-1307	1.07722	0.30926	0.757124
hsa-mir-92a-2	1.09171	0.309049	0.757284
hsa-mir-219a-2	1.04532	0.306654	0.759107
hsa-mir-6777	0.944909	-0.305536	0.759958
hsa-mir-450a-2	1.04807	0.303758	0.761312
hsa-mir-4645	1.04225	0.303022	0.761873
hsa-mir-147b	1.03404	0.300818	0.763553
hsa-mir-891a	1.02052	0.299278	0.764728
hsa-mir-4464	1.2041	0.298906	0.765012
hsa-mir-4512	1.34031	0.298906	0.765012
hsa-mir-132	0.934539	-0.29851	0.765314
hsa-mir-6771	1.16491	0.295431	0.767665
hsa-mir-374b	0.948094	-0.294656	0.768257
hsa-mir-146b	1.0614	0.294091	0.768688
hsa-mir-659	0.953425	-0.2933	0.769293
hsa-mir-3651	0.960064	-0.293057	0.769478
hsa-mir-1226	0.963462	-0.292167	0.770159
hsa-mir-2681	0.903767	-0.290321	0.77157
hsa-mir-6716	1.04254	0.289707	0.77204
hsa-mir-561	1.03246	0.289167	0.772454
hsa-mir-618	1.03748	0.287774	0.77352
hsa-mir-4770	0.917096	-0.287609	0.773646
hsa-mir-4655	1.34698	0.285245	0.775456
hsa-mir-4427	0.785661	-0.284996	0.775647
hsa-mir-3163	0.847237	-0.284714	0.775864
hsa-mir-378d-2	0.963634	-0.283773	0.776584
hsa-mir-1468	1.03624	0.283225	0.777005
hsa-mir-365a	1.03904	0.282262	0.777743
hsa-mir-519b	1.22509	0.280041	0.779446
hsa-mir-4772	0.967095	-0.277484	0.781409
hsa-mir-3145	0.922083	-0.275321	0.78307
hsa-mir-1260a	0.804753	-0.275261	0.783115
hsa-mir-4740	0.936803	-0.273773	0.784259
hsa-mir-1278	0.910848	-0.273714	0.784304
hsa-mir-154	1.06737	0.269523	0.787527
hsa-mir-5589	0.93136	-0.267219	0.7893
hsa-mir-129-2	0.982286	-0.265776	0.790412
hsa-mir-6749	1.07825	0.265009	0.791002
hsa-mir-3182	0.890487	-0.264003	0.791778
hsa-mir-4684	1.08166	0.263731	0.791987
hsa-mir-3613	0.95457	-0.263449	0.792205
hsa-mir-4435-2	0.91286	-0.263195	0.792401
hsa-mir-365b	1.03625	0.262198	0.793169
hsa-mir-3611	1.07816	0.261105	0.794012
hsa-mir-10a	0.946266	-0.257411	0.796861
hsa-mir-7847	1.3491	0.256173	0.797818
hsa-mir-4290	1.3491	0.256173	0.797818
hsa-mir-6890	1.21086	0.255464	0.798365
hsa-mir-3622b	0.898763	-0.255366	0.798441
hsa-mir-508	0.968593	-0.25397	0.799519
hsa-mir-6842	1.04216	0.251285	0.801594
hsa-mir-6746	1.0612	0.247854	0.804247
hsa-mir-597	1.06894	0.246595	0.805222
hsa-let-7c	0.972322	-0.243481	0.807633
hsa-mir-339	1.04596	0.241945	0.808823
hsa-mir-3939	0.849404	-0.241572	0.809112
hsa-mir-499b	0.916937	-0.239305	0.810869
hsa-mir-25	0.93279	-0.239202	0.810949
hsa-mir-3928	0.970828	-0.239099	0.811029
hsa-mir-590	1.05917	0.236201	0.813277
hsa-mir-6811	0.921132	-0.234995	0.814213
hsa-mir-519a-1	0.975696	-0.234206	0.814825
hsa-mir-6087	0.960769	-0.2308	0.81747
hsa-mir-519d	0.947091	-0.230589	0.817634
hsa-mir-4715	0.942393	-0.229732	0.8183
hsa-mir-3116-1	0.902314	-0.227834	0.819775
hsa-mir-4698	1.18559	0.22103	0.825069
hsa-mir-5006	0.894056	-0.220125	0.825774
hsa-mir-299	0.965661	-0.219813	0.826017
hsa-mir-1227	0.940947	-0.219553	0.826219
hsa-mir-2682	0.937211	-0.21825	0.827235
hsa-mir-4724	1.0254	0.21735	0.827936
hsa-mir-490	0.986043	-0.216644	0.828486
hsa-mir-6883	1.08159	0.216568	0.828545
hsa-mir-548d-2	1.05314	0.215998	0.828989
hsa-mir-4700	0.933167	-0.214032	0.830522
hsa-mir-6071	1.22905	0.213812	0.830694
hsa-mir-302d	1.0895	0.212948	0.831367
hsa-mir-6752	1.20586	0.212235	0.831923
hsa-mir-1915	1.12311	0.211593	0.832425
hsa-mir-4678	1.11177	0.208451	0.834877
hsa-mir-4473	0.971238	-0.207414	0.835686
hsa-mir-1224	0.986966	-0.206692	0.83625
hsa-mir-543	0.959476	-0.206024	0.836772
hsa-mir-4778	0.964415	-0.204884	0.837662
hsa-mir-6864	1.11927	0.201792	0.84008
hsa-mir-6785	1.10653	0.20146	0.840339
hsa-mir-642a	0.976433	-0.20047	0.841113
hsa-mir-3660	1.09464	0.199702	0.841714
hsa-mir-1249	0.96937	-0.198136	0.842939
hsa-mir-3130-1	0.980937	-0.196592	0.844146
hsa-mir-3193	1.02868	0.196507	0.844213
hsa-mir-6829	0.88109	-0.195287	0.845168
hsa-mir-891b	1.03935	0.192982	0.846973
hsa-mir-211	0.964387	-0.191383	0.848225
hsa-mir-6134	0.855639	-0.190195	0.849156
hsa-mir-521-2	1.10083	0.190029	0.849286
hsa-mir-6789	0.912244	-0.186921	0.851722
hsa-mir-6748	0.960705	-0.18559	0.852767
hsa-mir-6832	0.886265	-0.185275	0.853014
hsa-mir-6810	0.966338	-0.183351	0.854523
hsa-mir-5580	0.974676	-0.181716	0.855806
hsa-mir-3942	1.03005	0.181281	0.856147
hsa-mir-660	0.952247	-0.181011	0.856359
hsa-mir-556	0.974919	-0.180908	0.85644
hsa-mir-7109	1.07146	0.179955	0.857188
hsa-mir-6732	1.05516	0.179505	0.857541
hsa-mir-3936	0.952338	-0.179071	0.857882
hsa-mir-1-2	1.01633	0.176606	0.859818
hsa-mir-605	0.975048	-0.175517	0.860673
hsa-mir-1234	0.957955	-0.173171	0.862517
hsa-mir-4528	1.10735	0.171759	0.863627
hsa-mir-6758	1.04643	0.169702	0.865245
hsa-mir-676	1.02643	0.16928	0.865577
hsa-mir-320d-2	0.974455	-0.166154	0.868035
hsa-mir-4648	0.93764	-0.164775	0.869121
hsa-mir-4775	1.02769	0.163227	0.87034
hsa-mir-338	0.979302	-0.162639	0.870803
hsa-mir-4757	0.940302	-0.162618	0.870819
hsa-mir-489	0.976401	-0.162472	0.870934
hsa-mir-6718	0.982228	-0.162189	0.871157
hsa-mir-3680-2	0.958873	-0.161905	0.871381
hsa-mir-6799	0.944343	-0.160406	0.872561
hsa-mir-4523	1.0372	0.157987	0.874467
hsa-mir-3914-1	0.87417	-0.156751	0.875441
hsa-mir-6807	1.03709	0.155568	0.876373
hsa-mir-149	1.02129	0.155	0.876822
hsa-mir-4510	1.02526	0.153602	0.877923
hsa-mir-374c	1.03005	0.152918	0.878463
hsa-mir-3198-2	0.95794	-0.152208	0.879023
hsa-mir-3916	1.08524	0.151538	0.879551
hsa-mir-1269a	1.00899	0.150906	0.88005
hsa-mir-485	0.968719	-0.149966	0.880791
hsa-mir-219b	1.02234	0.148881	0.881648
hsa-mir-18a	1.0256	0.148222	0.882168
hsa-mir-6881	0.941724	-0.147672	0.882602
hsa-mir-378c	0.973598	-0.147326	0.882875
hsa-mir-129-1	0.990413	-0.14709	0.883061
hsa-mir-4754	1.03324	0.144708	0.884942
hsa-mir-451a	1.01179	0.140731	0.888082
hsa-mir-5191	1.07511	0.139244	0.889257
hsa-mir-520a	0.978874	-0.137883	0.890333
hsa-mir-30c-2	0.973126	-0.1375	0.890636
hsa-mir-4431	1.01883	0.137393	0.89072
hsa-mir-29b-1	0.976567	-0.137092	0.890958
hsa-mir-5584	0.949844	-0.136474	0.891447
hsa-mir-518e	1.02721	0.135203	0.892452
hsa-mir-6780b	1.05208	0.134423	0.893068
hsa-mir-509-2	1.01634	0.134252	0.893203
hsa-mir-186	1.05526	0.133713	0.893629
hsa-mir-1245a	0.982561	-0.131556	0.895336
hsa-mir-2115	0.980545	-0.131549	0.895341
hsa-mir-527	0.973197	-0.131424	0.89544
hsa-mir-1281	1.13769	0.129949	0.896607
hsa-mir-378h	1.13769	0.129949	0.896607
hsa-mir-802	0.994475	-0.128811	0.897507
hsa-mir-3175	0.959442	-0.128589	0.897683
hsa-mir-1182	0.874734	-0.127779	0.898324
hsa-mir-6827	1.04072	0.127627	0.898444
hsa-mir-548j	1.01696	0.125795	0.899895
hsa-mir-3177	0.972229	-0.125403	0.900205
hsa-mir-4710	0.957508	-0.123609	0.901625
hsa-mir-7851	1.09223	0.123194	0.901954
hsa-mir-1247	0.985202	-0.122747	0.902307
hsa-mir-873	1.01958	0.121548	0.903257
hsa-mir-4743	1.03326	0.121419	0.903359
hsa-mir-564	0.938765	-0.120508	0.904081
hsa-mir-4714	0.978988	-0.120036	0.904455
hsa-mir-6514	0.98083	-0.119548	0.904841
hsa-mir-4538	1.10352	0.119142	0.905163
hsa-mir-1908	0.956989	-0.118308	0.905824
hsa-mir-381	1.02173	0.118302	0.905828
hsa-mir-3941	1.0177	0.117582	0.906399
hsa-mir-4777	0.982957	-0.117334	0.906596
hsa-mir-6809	0.970414	-0.11617	0.907518
hsa-mir-3202-2	0.959298	-0.116009	0.907645
hsa-mir-4529	0.976507	-0.113417	0.9097
hsa-mir-302b	1.02412	0.112797	0.910192
hsa-mir-1304	1.01154	0.111716	0.911049
hsa-mir-378i	0.966273	-0.111674	0.911082
hsa-mir-4666a	1.03444	0.11111	0.911529
hsa-mir-4773-1	0.972614	-0.109535	0.912778
hsa-mir-1909	0.941826	-0.108899	0.913283
hsa-mir-539	0.981132	-0.108154	0.913874
hsa-mir-361	1.05499	0.108079	0.913933
hsa-mir-3618	1.02744	0.107195	0.914634
hsa-let-7i	0.969425	-0.106622	0.915089
hsa-mir-4457	0.892058	-0.106105	0.915499
hsa-mir-3161	0.984843	-0.104402	0.916851
hsa-mir-514b	1.03235	0.101685	0.919006
hsa-mir-6871	0.969892	-0.100573	0.91989
hsa-mir-1306	0.977407	-0.0979831	0.921946
hsa-mir-4524a	0.981255	-0.0967777	0.922903
hsa-mir-376c	0.980999	-0.0946007	0.924632
hsa-mir-4664	1.01387	0.0933974	0.925588
hsa-mir-4676	1.01098	0.0903366	0.92802
hsa-mir-6501	0.986266	-0.0894589	0.928717
hsa-mir-6506	1.02011	0.0888933	0.929167
hsa-mir-4449	0.987137	-0.0887257	0.9293
hsa-mir-7106	1.06905	0.0883176	0.929624
hsa-mir-548ad	1.06905	0.0883176	0.929624
hsa-mir-6769b	1.03095	0.0878547	0.929992
hsa-mir-3178	1.01987	0.087826	0.930015
hsa-mir-6840	0.949588	-0.0876132	0.930184
hsa-mir-943	0.972609	-0.087252	0.930471
hsa-mir-345	0.98351	-0.0864773	0.931087
hsa-mir-6877	1.01688	0.0864071	0.931143
hsa-mir-483	1.0067	0.0851237	0.932163
hsa-mir-548ao	1.04423	0.0802002	0.936078
hsa-mir-4730	0.957774	-0.0797241	0.936457
hsa-mir-6863	0.961721	-0.0796257	0.936535
hsa-mir-1323	1.02742	0.0794783	0.936652
hsa-mir-127	0.983468	-0.0773224	0.938367
hsa-mir-4526	0.967609	-0.0757389	0.939627
hsa-mir-3677	0.991236	-0.0724455	0.942247
hsa-mir-4652	0.990829	-0.0722621	0.942393
hsa-mir-1291	0.987512	-0.0720669	0.942549
hsa-mir-1912	0.947912	-0.0709264	0.943456
hsa-mir-4639	1.02553	0.0706487	0.943677
hsa-mir-520b	1.01358	0.0704174	0.943861
hsa-mir-6502	0.989598	-0.0685824	0.945322
hsa-mir-331	1.01569	0.0678667	0.945892
hsa-mir-128-2	1.018	0.0676983	0.946026
hsa-mir-4536-1	0.988215	-0.0657855	0.947549
hsa-mir-7641-2	1.02005	0.0654094	0.947848
hsa-mir-6821	1.01842	0.0652445	0.947979
hsa-mir-518f	0.981231	-0.0649626	0.948204
hsa-mir-559	1.01167	0.0642404	0.948779
hsa-mir-940	1.00966	0.0640514	0.948929
hsa-mir-214	1.0139	0.0633158	0.949515
hsa-mir-523	0.97759	-0.0620456	0.950527
hsa-mir-153-1	0.993071	-0.0620229	0.950545
hsa-mir-549a	1.00766	0.0607602	0.95155
hsa-mir-7977	0.97146	-0.0601782	0.952014
hsa-mir-371a	0.970994	-0.0593284	0.952691
hsa-mir-487a	1.0082	0.0558759	0.955441
hsa-mir-548al	0.967835	-0.0543206	0.95668
hsa-mir-5188	1.01801	0.0540012	0.956934
hsa-mir-3200	1.00693	0.0522853	0.958301
hsa-mir-625	0.989071	-0.0515881	0.958857
hsa-mir-3653	1.00747	0.0472702	0.962298
hsa-mir-8077	1.04938	0.0467983	0.962674
hsa-mir-376a-1	0.991844	-0.0451431	0.963993
hsa-mir-4420	1.02573	0.0413201	0.967041
hsa-mir-7155	0.992433	-0.0411486	0.967177
hsa-mir-3189	0.991301	-0.0410413	0.967263
hsa-mir-3938	1.02632	0.0408712	0.967399
hsa-mir-375	1.00296	0.039953	0.968131
hsa-mir-518a-2	0.991245	-0.0393085	0.968644
hsa-mir-6795	0.979769	-0.0391362	0.968782
hsa-mir-5088	0.976542	-0.0385483	0.969251
hsa-mir-1185-2	1.00639	0.03843	0.969345
hsa-mir-4689	0.968719	-0.0361746	0.971143
hsa-mir-4732	0.994603	-0.0354403	0.971729
hsa-mir-6742	0.987578	-0.0353021	0.971839
hsa-mir-383	0.997134	-0.0350646	0.972028
hsa-mir-3922	0.994325	-0.0341743	0.972738
hsa-mir-4429	0.964006	-0.0328006	0.973834
hsa-mir-552	0.998312	-0.0325882	0.974003
hsa-mir-4436b-2	0.980304	-0.0285273	0.977242
hsa-mir-623	1.02437	0.0282693	0.977447
hsa-mir-6744	0.995461	-0.0279425	0.977708
hsa-mir-507	0.987579	-0.0254991	0.979657
hsa-mir-1258	0.997104	-0.025287	0.979826
hsa-mir-4680	1.00447	0.0214248	0.982907
hsa-mir-4658	1.00346	0.0208603	0.983357
hsa-mir-377	1.00405	0.0207963	0.983408
hsa-mir-4789	0.994472	-0.0194833	0.984456
hsa-mir-5690	0.996886	-0.0184487	0.985281
hsa-mir-3117	0.997689	-0.0182196	0.985464
hsa-mir-4725	1.00408	0.0163553	0.986951
hsa-mir-3622a	1.00192	0.0141223	0.988732
hsa-mir-4662b	0.995244	-0.0130512	0.989587
hsa-mir-208b	1.01342	0.0126891	0.989876
hsa-mir-433	1.00213	0.0116548	0.990701
hsa-mir-4536-2	1.0019	0.0109394	0.991272
hsa-mir-550a-3	1.00145	0.0108422	0.991349
hsa-mir-548k	0.997929	-0.0107801	0.991399
hsa-mir-7706	0.998654	-0.0100405	0.991989
hsa-mir-4733	1.00192	0.00828952	0.993386
hsa-mir-3138	1.00177	0.00694875	0.994456
hsa-mir-4711	1.04853e-06	-0.00621738	0.995039
hsa-mir-4315-2	1.01113e-07	-0.00611132	0.995124
hsa-mir-638	1.01113e-07	-0.00611132	0.995124
hsa-mir-7973-1	1.84519e-08	-0.00591709	0.995279
hsa-mir-6076	1.10469e-10	-0.00589608	0.995296
hsa-mir-548p	7.06962e-10	-0.00578564	0.995384
hsa-mir-5195	3.19292e-07	-0.00554408	0.995576
hsa-mir-7973-2	8.56473e-09	-0.00554408	0.995576
hsa-mir-4656	5.86267e-07	-0.00554408	0.995576
hsa-mir-4296	3.64897e-11	-0.00543853	0.995661
hsa-mir-548ap	3.64897e-11	-0.00543853	0.995661
hsa-mir-3685	8.50745e-09	-0.00533444	0.995744
hsa-mir-587	8.50745e-09	-0.00533444	0.995744
hsa-mir-1253	1.00428	0.00532399	0.995752
hsa-mir-151b	0.998941	-0.00518079	0.995866
hsa-mir-6857	6.17933e-08	-0.0051563	0.995886
hsa-mir-3914-2	1.00437e-07	-0.00511368	0.99592
hsa-mir-4643	0.995891	-0.00507872	0.995948
hsa-mir-6823	6.40599e-09	-0.00501361	0.996
hsa-mir-6861	2.00334e-09	-0.00496672	0.996037
hsa-mir-4720	2.1086e-06	-0.00495476	0.996047
hsa-mir-4693	2.69899e-10	-0.00484699	0.996133
hsa-mir-6828	3.26892e-10	-0.00481558	0.996158
hsa-mir-4513	3.20624e-08	-0.00481558	0.996158
hsa-mir-4295	3.20624e-08	-0.00481558	0.996158
hsa-mir-1273c	3.20624e-08	-0.00481558	0.996158
hsa-mir-5681a	8.74119e-08	-0.00481558	0.996158
hsa-mir-2117	8.27482e-07	-0.00479199	0.996177
hsa-mir-4537	1.07704e-08	-0.00463676	0.9963
hsa-mir-519e	4.87785e-11	-0.00452127	0.996393
hsa-mir-6848	1.15313e-05	-0.00443525	0.996461
hsa-mir-6778	4.3611e-09	-0.00435619	0.996524
hsa-mir-4437	6.8175e-07	-0.00426929	0.996594
hsa-mir-7978	6.8175e-07	-0.00426929	0.996594
hsa-mir-3164	4.62202e-08	-0.00406677	0.996755
hsa-mir-7855	5.19538e-10	-0.00404172	0.996775
hsa-mir-4764	3.23604e-11	-0.00403819	0.996778
hsa-mir-5047	3.75385e-07	-0.00403282	0.996782
hsa-mir-3199-1	1.00071	0.00400944	0.996801
hsa-mir-3649	1.1135e-11	-0.00396353	0.996838
hsa-mir-4783	8.21464e-06	-0.00378651	0.996979
hsa-mir-4284	8.82059e-12	-0.00375165	0.997007
hsa-mir-6775	0.998034	-0.00330604	0.997362
hsa-mir-4690	0.998987	-0.00287816	0.997704
hsa-mir-29a	1.00055	0.0022607	0.998196
hsa-mir-4432	3.9159e-29	-1.38824e-07	1
hsa-mir-5681b	NA	NA	NA
hsa-mir-8083	NA	NA	NA
hsa-mir-548f-4	1	NaN	NaN
hsa-mir-1469	1	NaN	NaN
hsa-mir-2861	1	NaN	NaN
hsa-mir-6745	1	NaN	NaN
hsa-mir-7160	1	NaN	NaN
hsa-mir-5692a-2	1	NaN	NaN
hsa-mir-1264	1	NaN	NaN
hsa-mir-3907	1	NaN	NaN
hsa-mir-378j	1	NaN	NaN
hsa-mir-617	1	NaN	NaN
hsa-mir-548ab	1	NaN	NaN
hsa-mir-4315-1	1	NaN	NaN
hsa-mir-5707	1	NaN	NaN
hsa-mir-5692a-1	1	NaN	NaN
hsa-mir-3675	1	NaN	NaN
hsa-mir-6835	1	NaN	NaN
hsa-mir-7157	1	NaN	NaN
hsa-mir-5590	1	NaN	NaN
hsa-mir-6760	1	NaN	NaN
hsa-mir-4495	1	NaN	NaN
hsa-mir-3119-2	1	NaN	NaN
hsa-mir-4260	1	NaN	NaN
hsa-mir-6792	1	NaN	NaN
hsa-mir-4721	1	NaN	NaN
hsa-mir-7975	1	NaN	NaN
hsa-mir-4737	1	NaN	NaN
hsa-mir-933	1	NaN	NaN
hsa-mir-1825	1	NaN	NaN
hsa-mir-4465	1	NaN	NaN
hsa-mir-6131	1	NaN	NaN
hsa-mir-3924	1	NaN	NaN
hsa-mir-3529	1	NaN	NaN
hsa-mir-3185	1	NaN	NaN
hsa-mir-548u	1	NaN	NaN
hsa-mir-3621	1	NaN	NaN
hsa-mir-7853	1	NaN	NaN
hsa-mir-5704	1	NaN	NaN
hsa-mir-602	1	NaN	NaN
hsa-mir-4428	1	NaN	NaN
hsa-mir-3119-1	1	NaN	NaN
hsa-mir-4485	1	NaN	NaN
hsa-mir-4722	1	NaN	NaN
hsa-mir-3184	1	NaN	NaN

## Sheet: Table S2
Table S2. The univariate survival analysis results of the prognostic related miRNAs target genes.
ID	HR	z	pvalue
CBX3	3.96012	3.47595	0.000509041
ERGIC2	3.40617	3.46324	0.000533719
STRIP1	0.279424	-3.14648	0.00165246
CCNB1	1.63998	3.10001	0.00193513
PTCH2	0.665686	-3.03792	0.00238221
PLEKHO2	0.608045	-2.9784	0.00289755
PXK	0.493483	-2.92716	0.00342068
UBE2H	2.41078	2.51731	0.0118255
SH3PXD2A	0.603507	-2.46304	0.0137766
TXNDC5	0.745432	-2.43912	0.014723
MZT1	1.93626	2.42849	0.0151618
LIN28B	1.34981	2.35978	0.0182856
JDP2	0.533059	-2.32487	0.0200787
PTGES3	1.9532	2.29139	0.0219409
CDK6	1.71972	2.29074	0.0219784
VAPA	2.25548	2.25018	0.0244374
FBXO45	2.36986	2.20451	0.0274886
ID4	0.768703	-2.19938	0.0278512
SLC4A7	0.722751	-2.1655	0.0303498
EPB41	0.609766	-2.14784	0.0317264
TACC1	0.691179	-2.13339	0.0328926
HSBP1	2.64285	2.09537	0.0361379
NCAPG2	1.53978	2.06539	0.0388865
STK4	0.567684	-2.05509	0.03987
YWHAE	2.2841	2.01838	0.043552
FYCO1	0.592186	-2.01193	0.0442274
MAP3K7	0.463768	-1.9863	0.0470002
HNRNPF	2.15908	1.97783	0.0479481
MRPS23	1.8982	1.95774	0.0502607
COLEC12	0.851042	-1.95168	0.0509757
NAA50	1.94236	1.89588	0.0579755
TMTC1	0.788733	-1.89367	0.0582683
SLC25A20	0.596208	-1.88071	0.0600109
ADIPOR2	1.37276	1.87456	0.0608526
H6PD	0.622201	-1.86472	0.0622209
ELAVL2	0.802789	-1.85537	0.0635428
ZNF566	0.626407	-1.83082	0.0671276
GOLGA1	0.409301	-1.77955	0.0751493
NAPG	1.60792	1.73845	0.0821321
NR2C2	0.709974	-1.73576	0.0826067
CD2AP	1.47363	1.73342	0.0830203
MYBL2	1.25666	1.73102	0.0834474
RTP4	1.3716	1.72917	0.0837791
SOS2	0.616117	-1.72801	0.0839858
HOXA9	1.19214	1.71788	0.085818
PYROXD1	1.61093	1.71144	0.0869997
ANKRD52	0.557128	-1.70906	0.0874392
EED	2.75747	1.69049	0.0909344
ERLIN1	1.65472	1.68912	0.0911973
LRRC8D	0.597586	-1.67525	0.0938846
PRDM1	0.77295	-1.65717	0.0974861
RAB10	1.72807	1.6486	0.0992295
SMIM13	0.613231	-1.64022	0.10096
SIK3	0.569144	-1.63521	0.102005
UBE2I	1.82225	1.62206	0.10479
ZFHX3	0.638426	-1.62205	0.104793
TFDP1	1.76742	1.62104	0.105009
CBFA2T3	0.809776	-1.60329	0.10887
MIER3	0.685496	-1.57781	0.11461
S100PBP	0.600986	-1.57742	0.1147
NIN	0.755671	-1.57498	0.115262
ZMYND8	1.54901	1.56346	0.117944
ZBTB39	0.705274	-1.55799	0.119237
PRDX3	1.77841	1.54542	0.122245
LCLAT1	1.61764	1.54023	0.123504
POLR3E	1.98824	1.53337	0.125186
COL19A1	0.909042	-1.5314	0.125671
XPO1	2.09012	1.52976	0.126077
JAK1	0.621814	-1.52057	0.128367
ATG2B	0.638341	-1.52019	0.128464
CELSR3	1.18518	1.51079	0.130842
PSMD7	1.77735	1.50708	0.131789
PAWR	1.63544	1.49836	0.13404
RAB31	0.830173	-1.49241	0.135593
TNRC6A	0.60416	-1.49219	0.13565
KRAS	1.39971	1.48423	0.137749
SRSF1	2.88909	1.47878	0.139198
UBE4B	0.665043	-1.45102	0.146775
PPTC7	1.3217	1.4434	0.148907
LIN7C	1.85921	1.40216	0.160867
H2AFX	1.22644	1.38918	0.164778
SRSF7	1.93303	1.36444	0.17243
NNT	0.715354	-1.3611	0.173482
MAST3	0.731309	-1.3367	0.181319
TRIM37	0.641621	-1.32501	0.185169
ZNRF1	1.43019	1.31638	0.188048
LHFPL2	0.743478	-1.31486	0.188557
EIF1	1.41875	1.31459	0.188646
EML4	0.648714	-1.28577	0.198525
GNAI2	0.660312	-1.28413	0.199095
FOXG1	0.850788	-1.27489	0.202347
ITGA5	0.82915	-1.26665	0.205281
KPNA6	0.592673	-1.25332	0.210089
DBF4	1.42913	1.25266	0.210331
SRSF2	1.69452	1.24745	0.212231
RAD23B	1.49786	1.23872	0.215448
IFNAR2	0.719019	-1.22924	0.218983
CACNA1E	0.864325	-1.22884	0.219133
PPARGC1B	0.814504	-1.22172	0.221814
NDEL1	0.59934	-1.20935	0.22653
G3BP1	1.53191	1.20236	0.229224
PPP1R12A	0.750502	-1.18311	0.236766
IKZF5	0.660619	-1.17791	0.238832
TWF1	1.3414	1.17713	0.239143
CEP350	0.727525	-1.17666	0.239333
SEC24A	0.802354	-1.17223	0.241106
KLF10	1.28017	1.13355	0.256985
GCLC	0.773859	-1.12381	0.261096
NR3C1	0.856139	-1.1093	0.267302
RBM41	1.30516	1.09102	0.275265
SOCS1	0.856048	-1.08285	0.278875
ADAM9	1.18155	1.0701	0.284575
VSIG10	1.26693	1.03065	0.302703
AKIRIN1	0.665656	-1.03016	0.302936
STAU1	1.49693	1.0285	0.303713
RNF165	1.12334	1.02715	0.304352
PHTF2	0.799483	-1.02069	0.307403
PGM3	0.760493	-1.00758	0.313656
LMBR1L	0.741066	-0.995222	0.319629
KIAA1324L	0.904722	-0.974588	0.329765
TRIM65	1.38621	0.963319	0.335387
BECN1	1.61786	0.963054	0.335521
NUFIP2	1.41624	0.945309	0.344501
SLC2A12	0.891432	-0.935883	0.349333
DYRK1A	0.666274	-0.933629	0.350495
JARID2	0.752473	-0.932932	0.350855
KDM3A	1.25566	0.920489	0.357317
FAM91A1	1.27267	0.919572	0.357797
CBX2	0.851106	-0.919201	0.357991
MYBL1	1.17417	0.914678	0.360361
DCDC2	0.933802	-0.903076	0.366486
HOXB6	1.1026	0.898713	0.368806
IP6K3	0.929754	-0.894759	0.370916
SP4	0.825728	-0.89351	0.371584
MIA3	0.774443	-0.889654	0.373652
TMEM135	0.764301	-0.883336	0.377055
KIAA1191	1.37252	0.88272	0.377388
SIX4	1.13509	0.880457	0.378612
UBN1	1.34921	0.879043	0.379378
BAHD1	0.670664	-0.878111	0.379884
PHEX	0.893127	-0.877425	0.380256
GPBP1	1.51467	0.84236	0.399586
AVL9	1.30357	0.828101	0.407613
MAR6	1.38101	0.822968	0.410526
ZFAND5	0.770219	-0.821342	0.411451
ARPP19	1.3667	0.809629	0.418154
FOXC1	1.14479	0.800047	0.423684
SLC35B3	0.76612	-0.795543	0.426298
L2HGDH	1.20558	0.786907	0.431336
UBE3C	1.29304	0.780734	0.434959
CDKN1B	1.32132	0.774647	0.438548
SOCS3	0.904203	-0.763954	0.444895
MTDH	1.18098	0.694673	0.48726
PCDH10	0.935411	-0.693526	0.487979
SLC38A7	0.750011	-0.672622	0.501188
MYT1L	0.958242	-0.645164	0.518821
SOS1	0.839238	-0.642094	0.520812
USP37	0.910378	-0.61751	0.536898
ZNF644	0.833859	-0.60722	0.543705
BZW1	1.14627	0.586801	0.557338
ZNF239	1.19824	0.580783	0.561387
HIC2	0.834346	-0.575285	0.565098
NRBP1	0.778187	-0.575153	0.565188
LONRF3	1.09279	0.56311	0.57336
ZDHHC20	1.15165	0.557812	0.576973
ZNF711	0.88648	-0.519854	0.603165
RAP1B	0.867783	-0.514454	0.606934
JOSD1	1.2039	0.514133	0.607159
OTUD4	1.15685	0.506833	0.612272
FAM104A	1.21446	0.504682	0.613782
TRIM8	1.14818	0.491142	0.623326
IVNS1ABP	1.13926	0.477834	0.632768
MTHFD2	1.12105	0.477313	0.633139
PTP4A1	1.09408	0.474173	0.635376
PCGF5	0.883053	-0.470761	0.637811
ADO	0.82001	-0.45954	0.645846
TAF4B	1.08427	0.453991	0.649835
ZBTB41	1.10619	0.429259	0.667735
HOXC8	0.968743	-0.416731	0.676875
MKRN3	0.967421	-0.405267	0.685282
PPIF	0.920778	-0.389615	0.696821
GALNT1	1.09921	0.351458	0.725245
BRWD3	0.925348	-0.342193	0.732206
TBC1D10B	0.879348	-0.33878	0.734775
SNAP25	1.02789	0.328851	0.742268
NFAT5	0.959068	-0.31086	0.755907
ATP2A2	1.08413	0.300607	0.763714
KMT2A	0.927277	-0.269864	0.787265
RBFOX1	1.02342	0.267539	0.789054
VPS33A	1.11699	0.260415	0.794543
LCOR	1.06163	0.256174	0.797817
DHX40	0.914978	-0.242803	0.808158
PPP1R2	0.90764	-0.235597	0.813746
STX16	1.07643	0.232725	0.815975
SETD5	0.91503	-0.230274	0.817879
SETD3	1.10841	0.214107	0.830463
UBXN2B	0.93593	-0.203832	0.838485
PER2	1.05625	0.200627	0.840991
LRRC58	0.94728	-0.194331	0.845917
LIMCH1	1.03504	0.183122	0.854703
ANKRA2	1.06056	0.178334	0.85846
CHD1	0.955859	-0.171201	0.864066
PTPN4	0.951725	-0.156677	0.8755
DDAH1	0.968744	-0.156343	0.875763
MAPK8	1.06659	0.144991	0.884718
TAOK1	1.03652	0.137843	0.890364
CDC37L1	0.954062	-0.130964	0.895804
DCTN4	1.04881	0.13058	0.896108
AFF4	0.972141	-0.128404	0.89783
BTG2	1.01474	0.106759	0.914981
GLCE	1.02572	0.0970153	0.922714
GLO1	0.964043	-0.0959805	0.923536
PEG10	1.00832	0.0738727	0.941112
CSNK1G1	0.980226	-0.0575348	0.954119
PICALM	0.977188	-0.0571958	0.954389
WDR26	1.02025	0.0419121	0.966569
ZBTB43	0.991584	-0.0390024	0.968888
DCAF8	1.01279	0.0343072	0.972632
TPR	1.01184	0.0308476	0.975391
PLAG1	0.997115	-0.0286957	0.977107
CTDSPL2	1.00484	0.0128327	0.989761
MIB1	1.00217	0.00958441	0.992353
NT5C1B	0.99932	-0.00501108	0.996002
